# Supplementary material for: Investigating the effects of a novel gamified cognitive training on adolescent mental health
Source: Research Square preprint supplement (doi:10.21203/rs.3.rs-5900018/v1), 2025-02-03
Supplement: Supplementary file 1 [file a01364c66ee272e49593a2cb.docx]

**Investigating the effects of a novel gamified cognitive training on adolescent mental health**

**Supplementary Materials**

**Sample Size Calculation**

A sample size calculation with Cohen’s *f* = 0.20 yielded a sample of *N* = 102 at a power of 90% with a significance threshold of α = .008 to correct for 6 outcomes of interest. While a review of paediatric cognitive control training showed moderate to large effects of training on various clinical outcomes (1), we used the small to moderate effect size listed above to be conservative as some of our outcomes of interest had not previously been tested using affective control training. Assuming an attrition/non-compliance rate of 40% (2), we aimed to recruit *N* = 144 participants who completed the study faithfully (failed no more than 2 out of 5 attention check items at baseline). Where possible, advertisements and invitations were targeted at individuals residing in Australia and the United Kingdom, although participants from the United States of America and India signed up through social media advertising and were allowed to participate if they met the other eligibility requirements.

**Eligibility Criteria**

To sign up for the study, participants had to: be aged 13-16 years; have daily access to a device with internet connectivity (e.g., smartphone or tablet), as the experiment was conducted completely online; read English with native fluency, as all assessments and training relied on adequate reading ability; and have no history of traumatic brain injury (TBI), as the training placed significant executive functioning demands, which is often impaired in those with TBI (3).

**Participant Exclusions**

In total, 253 participants were recruited and completed the baseline questionnaires (Figure S1). Of these, 1 participant withdrew from the study and 12 failed more than 2 attention checks and were excluded from the study for a total of 240 participants recruited and completing baseline questionnaires. One additional participant failed more than 2 attention checks at baseline, but due to experimenter error was still assigned to a training app and completed training, so their baseline data was excluded but their training, post-training and follow-up assessment data was retained.

96 participants were excluded as they were flagged as likely fraudulent based on the following set of criteria (Figure S1): Qualtrics, the platform, which was used for study sign-ups has measures to indicate whether individuals completing the questionnaire are likely to be fraudulent or duplicates of previous participants; participants with duplicate scores higher than 75 or fraud scores higher than 30 on Qualtrics were excluded, as per the platform’s guidelines (4). Additionally, after the experiment’s advertisement had been online for over two weeks and signups had dwindled to only a few each day, experimenters also began to observe “bulk” signups, where multiple participants (10+) signed up within a few minutes of each other, most with high duplicate/fraud scores. However, “fraudulent” participants were still able to complete the study and received remuneration for their participation as we were ethically bound to once they were included in the study. The final sample used for data analyses from those recruited was therefore *N* = 144 (Table 1). While here we report the analyses with only those participants who appeared legitimate, we additionally repeated all data analyses with “fraudulent” participants included (see Tables S11-14 for output of the pre-registered analyses with the full sample included).

**Figure S1**

*Participant Recruitment, Inclusion and Exclusion*

*
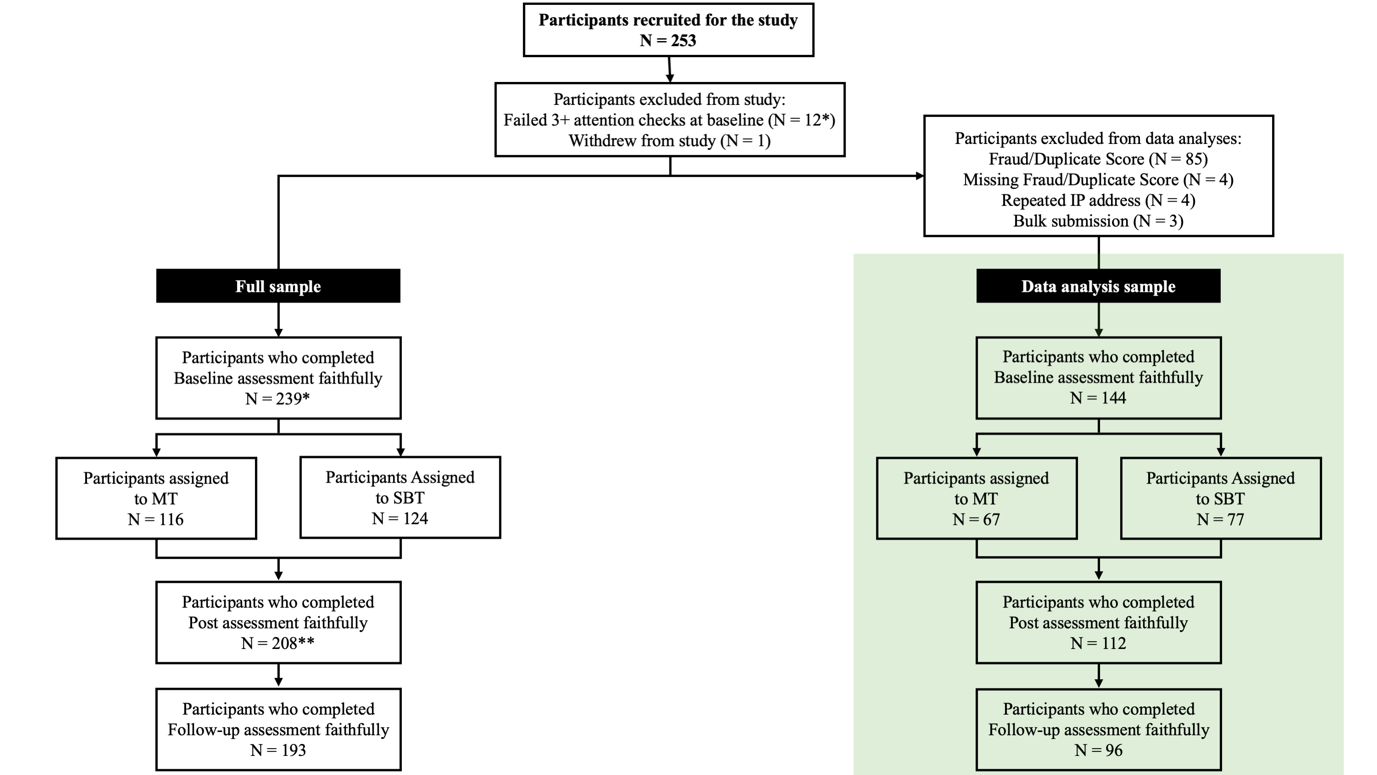
*

*Note*. *1 additional participant failed 3+ attention checks at baseline, but due to experimenter error was still assigned to a training group and completed training; this participant was therefore excluded from baseline but retained for training, post-training, and follow-up assessments in the full data sample. **4 participants completed post-training and follow-up measures at the same time; their questionnaire responses were therefore removed from the post-training time point, and the questionnaire responses they completed first were retained and used as follow-up questionnaire responses; their post-training task data was retained and we corrected for time between training completion and post-training task measure completion in the relevant analyses (H2-3); therefore, while *N* = 208 participants completed post-training task measures, only *N* = 204 completed post-training questionnaire measures.

**Training app randomization procedure**

Randomization, performed through computer-generated group assignment (5), was stratified by age and based on block randomization sequence with randomly mixed block sizes (2-6). JF and ABN were assigned to conduct group allocation and baseline assessments and to answer any participant queries, concerns or issues throughout study completion, and were not involved in data analysis. The remaining experimental staff were blinded to group allocation and helped conduct the remaining participant testing.

**Measures**

***Mental Health and Functioning (baseline, post-training, follow-up)***

**Anxiety symptoms.** Symptoms of anxiety were measured with the Generalized Anxiety Disorder 7 Scale (GAD-7; 6). The scale was made up of 7 items assessing how often anxiety symptoms were experienced over the last two weeks on a 4-point Likert scale ranging from 0 (*not at all*) to 3 (*nearly every day*). The scale demonstrated good internal consistency in the current sample at all time points (baseline: ωT = .94; post-training: ωT = .94; follow-up: ωT = .96). Item scores were added, with higher scores indicating greater severity of anxiety symptoms.

**Depression symptoms.** Symptoms of depression were measured with the Patient Health Questionnaire – Adolescent (PHQ-A; 7), a scale made up of 8 items assessing severity of depressive symptoms over the last two weeks. The 9th item, measuring suicidality, was omitted from the present study, as risk could not be managed in the context of an online study. Items were rated from 0 (*not at all*) to 3 (*nearly every day*) and were then summed, with higher scores indicating greater severity of depression symptoms. Internal consistency for the PHQ-A was excellent at each timepoint for the current sample (baseline: ωT = .94; post-training: ωT = .95; follow-up: ωT = .96)

**Functional impairment.** The functional impact of negative feelings on individuals’ functioning was assessed with a modified version of the Child Anxiety Life Interference Scale (CALIS; 8). The scale comprised 9 items measuring to what extent negative feelings upset participants or prevented them from doing a range of activities (e.g., getting on with parents, completing schoolwork, playing sport). Items were rated on a 5-point Likert scale ranging from *not at all* to *a great deal* and were then summed such that higher scores indicated greater functional impact of negative feelings. The CALIS showed good internal consistency in the current sample at all time points (baseline: ωT = .90; post-training: ωT = .90; follow-up: ωT = .93).

***Mechanisms of Change (baseline, post-training, follow-up)***

**Emotion regulation.** Emotion regulation was measured with the reappraisal subscale of the Emotion Regulation Questionnaire – child and adolescent version (ERQ-CA; 9), a 10-item scale measuring tendency to regulate emotions through cognitive reappraisal (e.g., “I control my feelings about things by changing the way I think about them”) and expressive suppression (e.g., “I control my feelings by not showing them”). Items were rated on a 7-point Likert Scale ranging from 1 (*strongly disagree*) to 7 (*strongly agree*). The reappraisal subscale was made up of 6 items, summed such that higher scores indicated greater emotion regulation, and showed good internal consistency at all time points (baseline: ωT = .90; post-training: ωT = .93; follow-up: ωT = .91).

**Rumination.** Rumination was assessed with the Repetitive Thinking Questionnaire (RTQ-10; 10). The scale was made up of 10 items rated on a 5-point Likert scale ranging from 1 (*not true at all*) to 5 (*very true*). Items measured how participants reacted in distressing situations (e.g., “I think about the situation all the time”), and scores were summed such that higher scores indicated greater rumination. The scale showed good internal consistency at all time points (baseline: ωT = .92; post-training: ωT = .93; follow-up: ωT = .93).

**Social Sensitivity.** Social sensitivity was assessed with the Online and Offline Social Sensitivity Scale (O2S3; 11). The O2S3 assessed social sensitivity in both offline and online contexts through 18 items rated on a 4-point Likert scale ranging from 0 (*strongly disagree*) to 3 (*strongly agree*). Scores were summed such that higher scores indicated greater social sensitivity. The scale demonstrated acceptable internal consistency at all time points (baseline: ωT = .90; post-training: ωT = .92; follow-up: ωT = .87).

**Social risk concern.** Concern for social risk was measured with the Health and Social Risk Questionnaire’s (HSRQ; 12) social subscale. This subscale was made up of 6 items assessing how worried participants would feel performing different actions relating to social activities (e.g., “defend an unpopular opinion that you believe in”). The items were rated on a rating scale ranging from 0 (*not worried at all*) to 100 (*very worried*). Social risk concern was indexed as the average of these items, with higher scores indicating greater concern. The scale demonstrated acceptable internal consistency at all time points (baseline: ωT = .78; post-training: ωT = .84; follow-up: ωT = .80).

***App Acceptability (post-training)***

Participants were first asked how much of the training they had completed on their assigned app: none of it, part of it, most of it, or almost all of it. Those who selected an answer indicating at least partial training completion were then asked to answer whether they believed their assigned app was helpful, easy to use, and whether they liked using it. These three additional questions were rated on 5-point Likert Scales ranging from 0 (*not at all*) to 4 (*very*).

**Figure S2**

*Study Procedure Flow Chart*

*
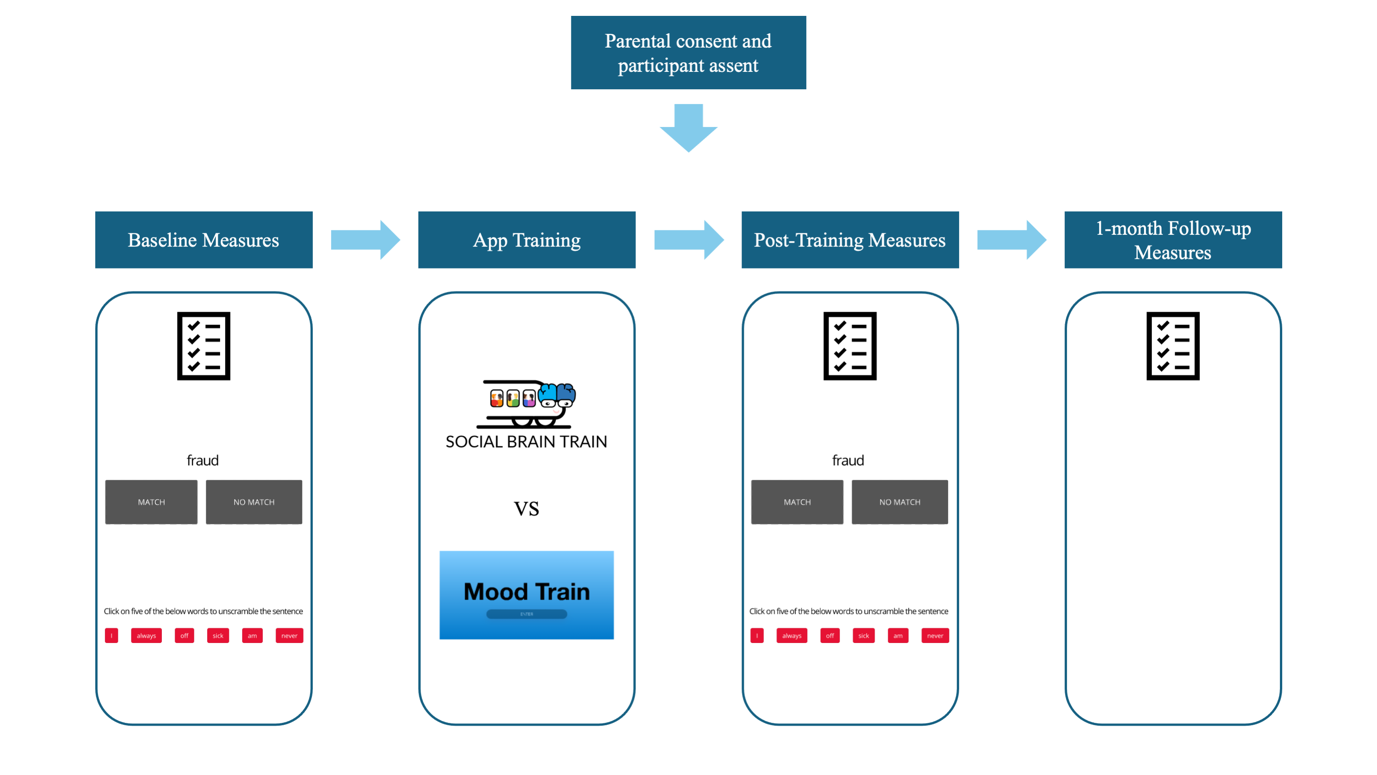
*

*Note*. The figure depicts the study procedure.
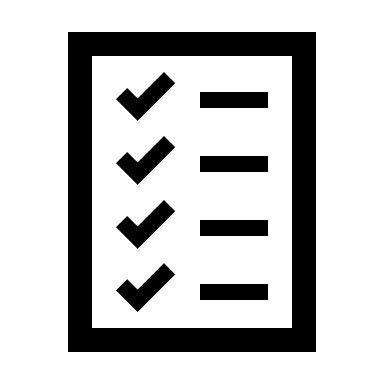
= self-report measures (demographics questionnaire (only at baseline), daily screentime usage, ERQ-CA, RTQ-10, PHQ-A, CALIS; GAD-7, O2S3; HSRQ, training app acceptability (only at follow-up)); = 2-back task (emotional and neutral conditions); = scrambled sentences task;
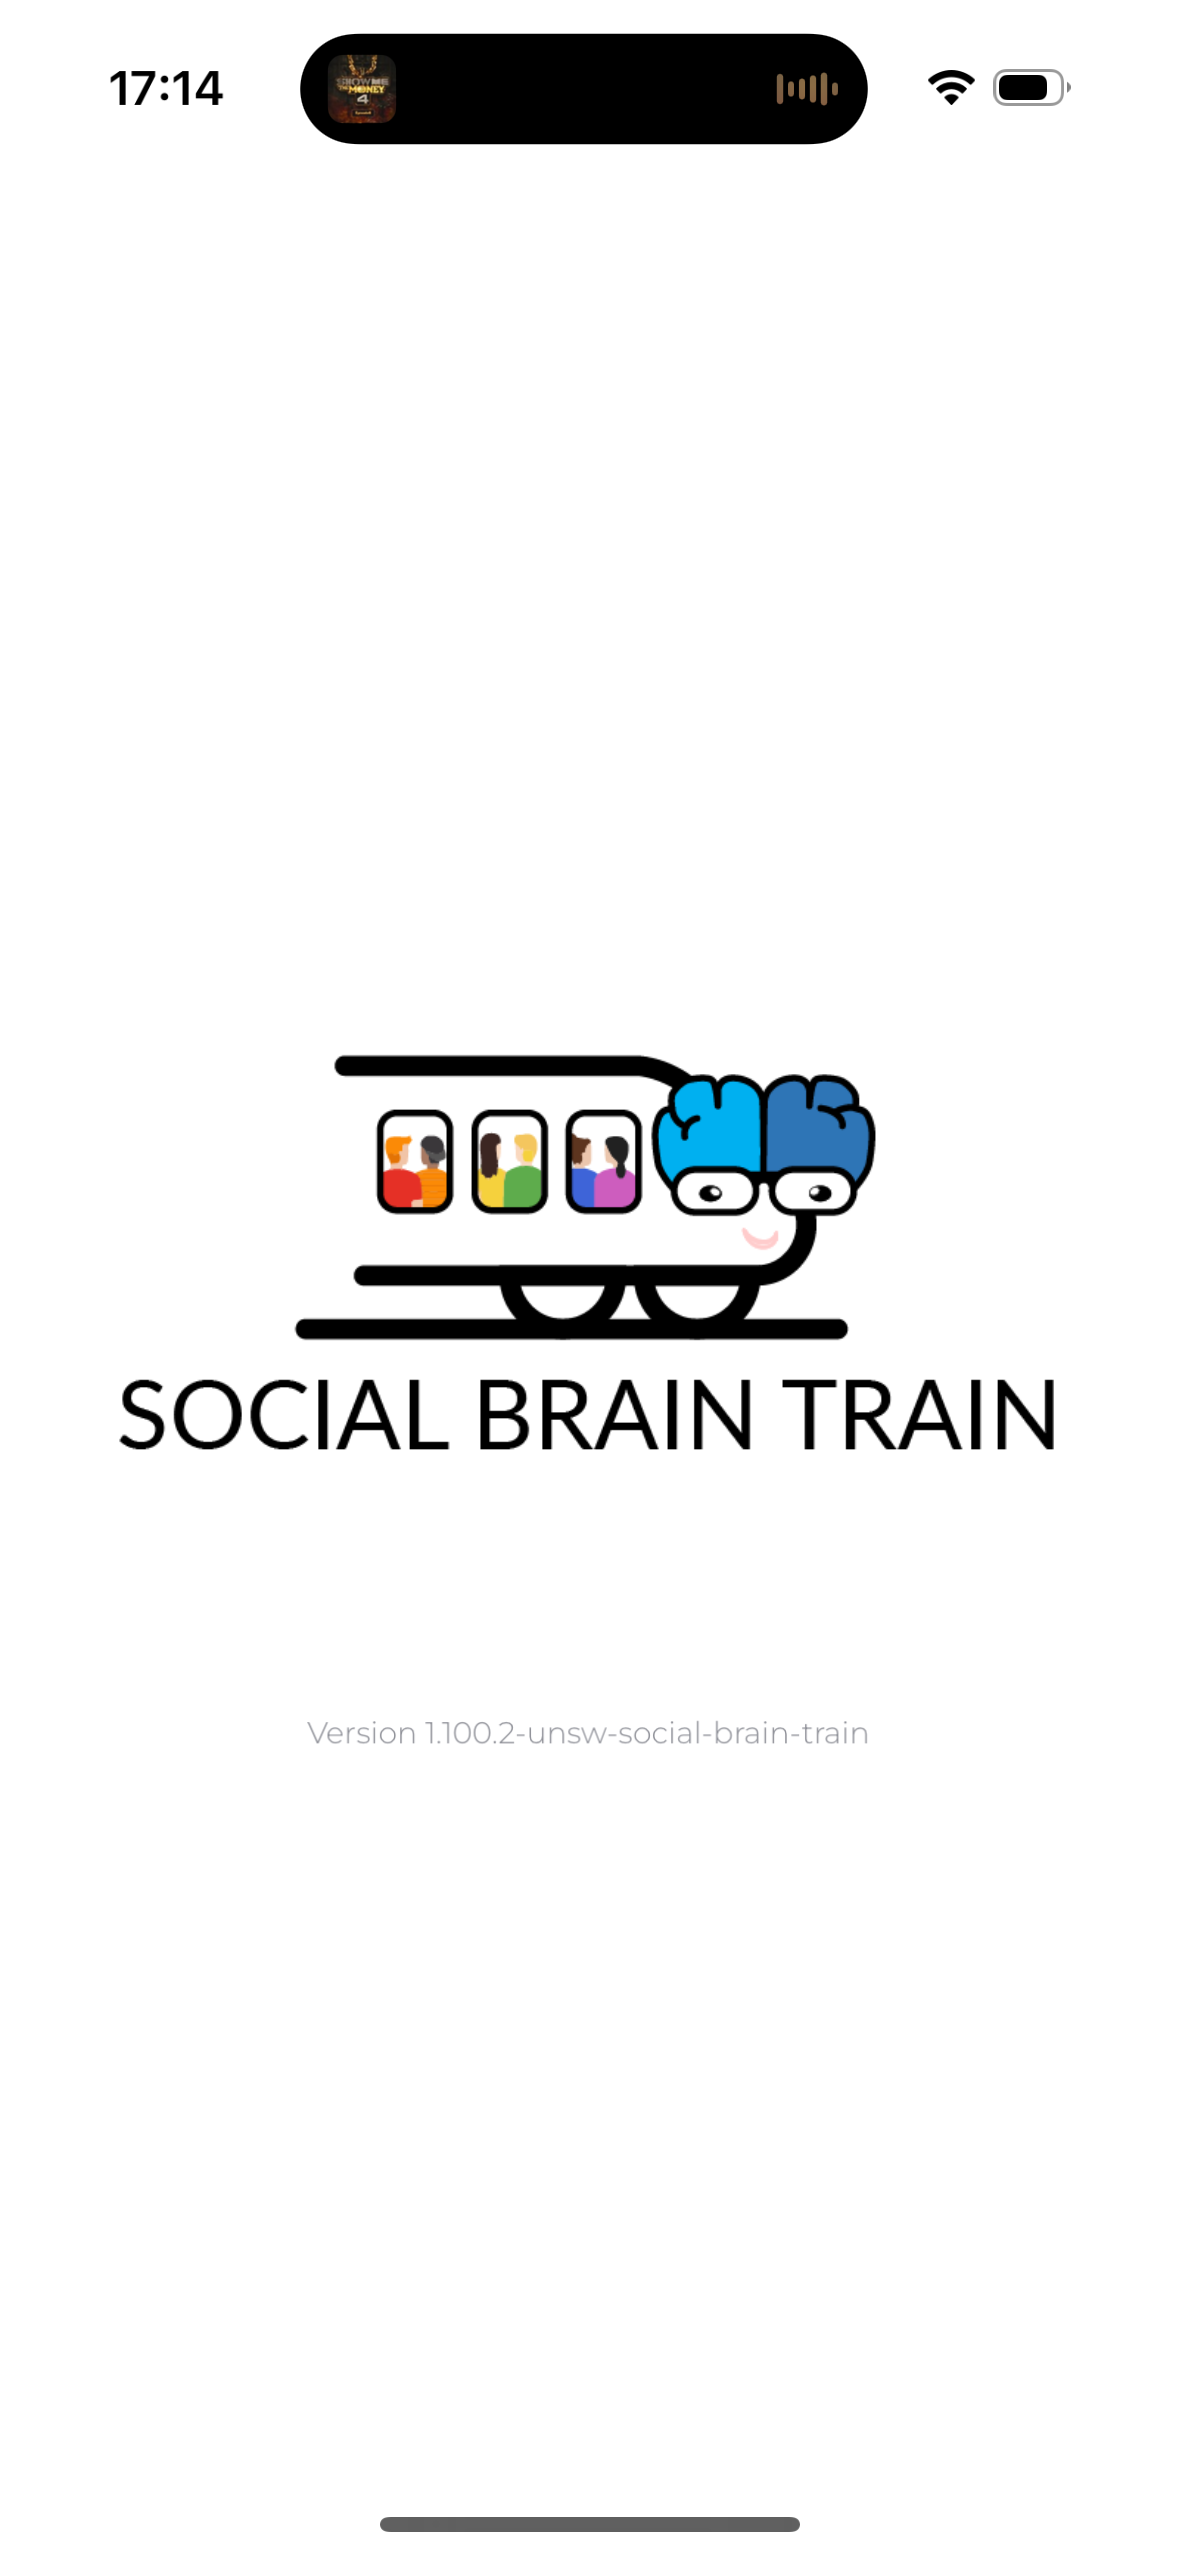
= Social Brain Train app training group;
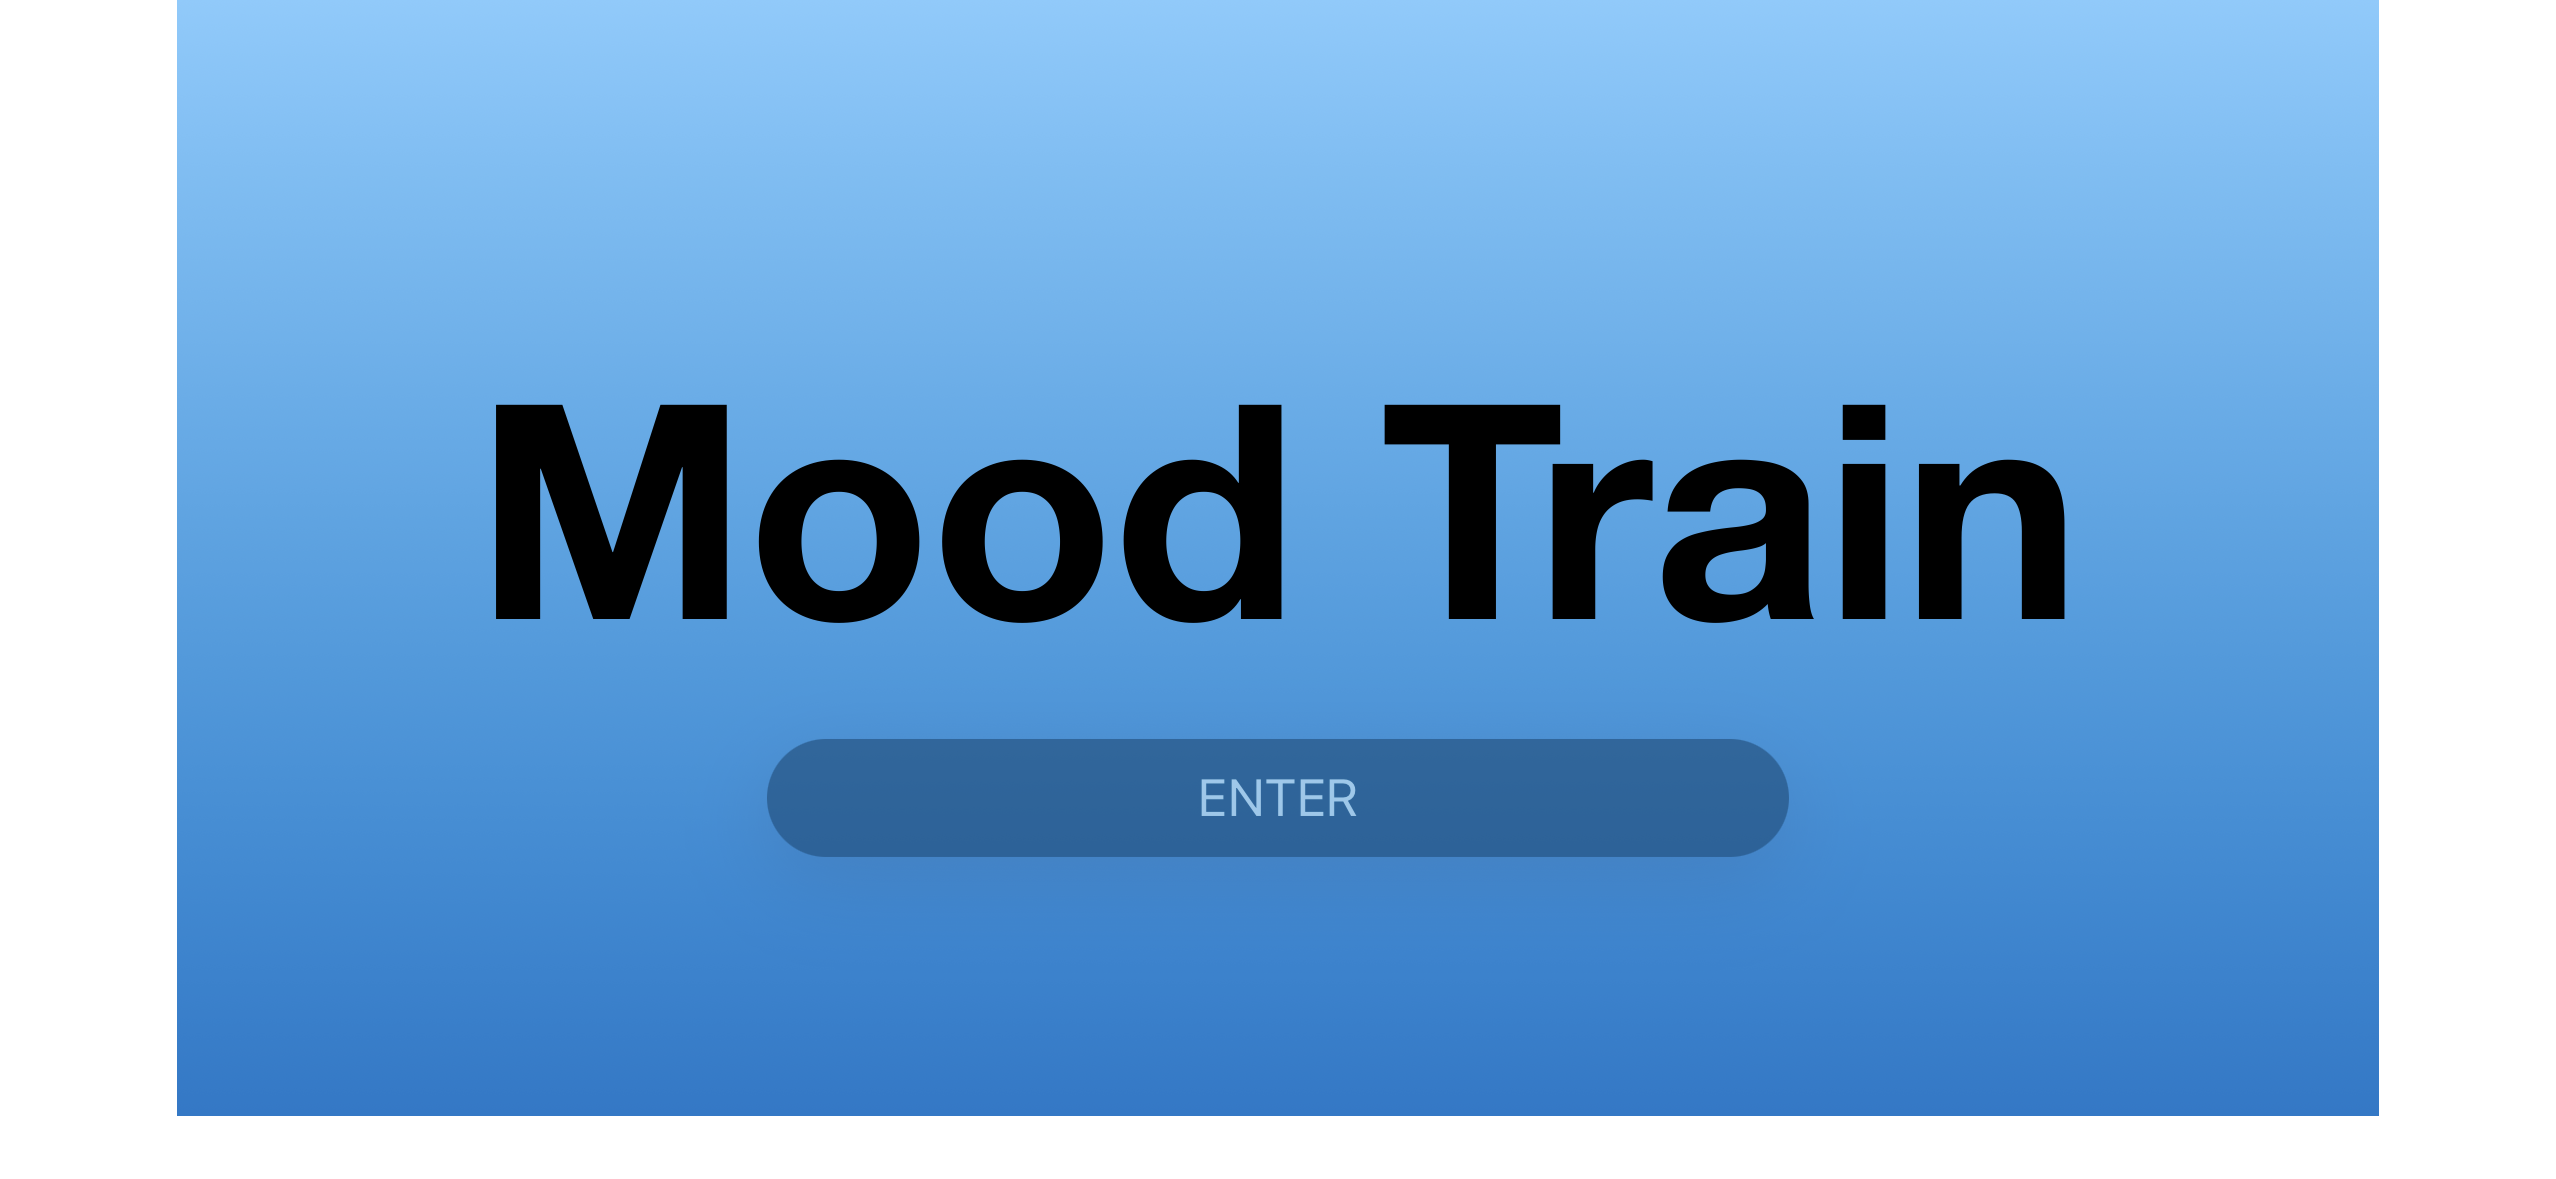
= AffeCT app training group.


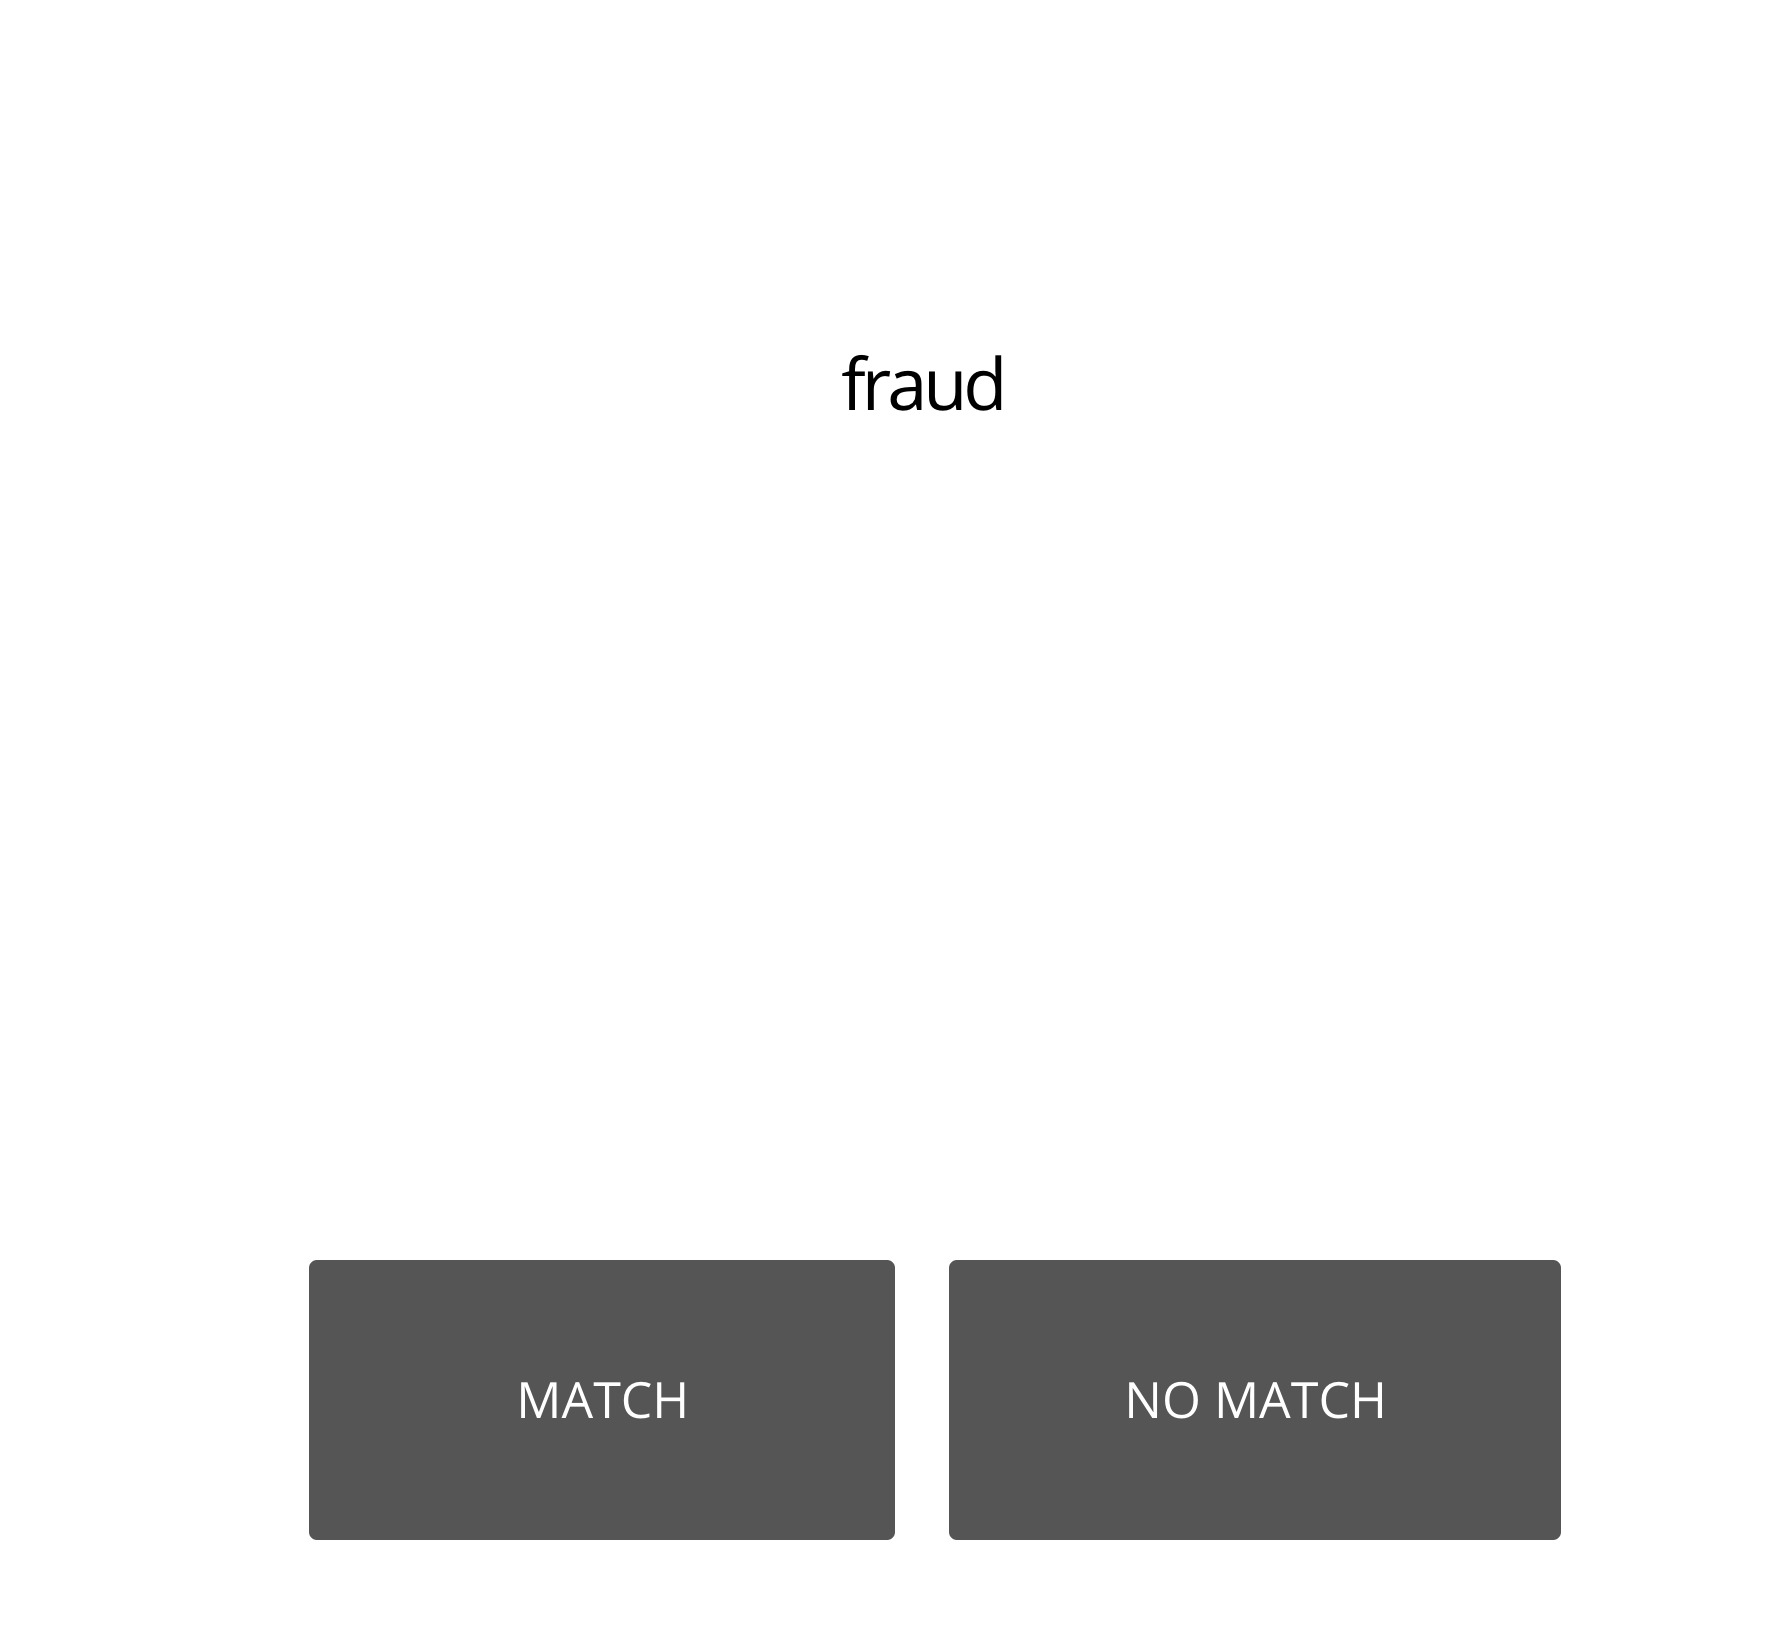

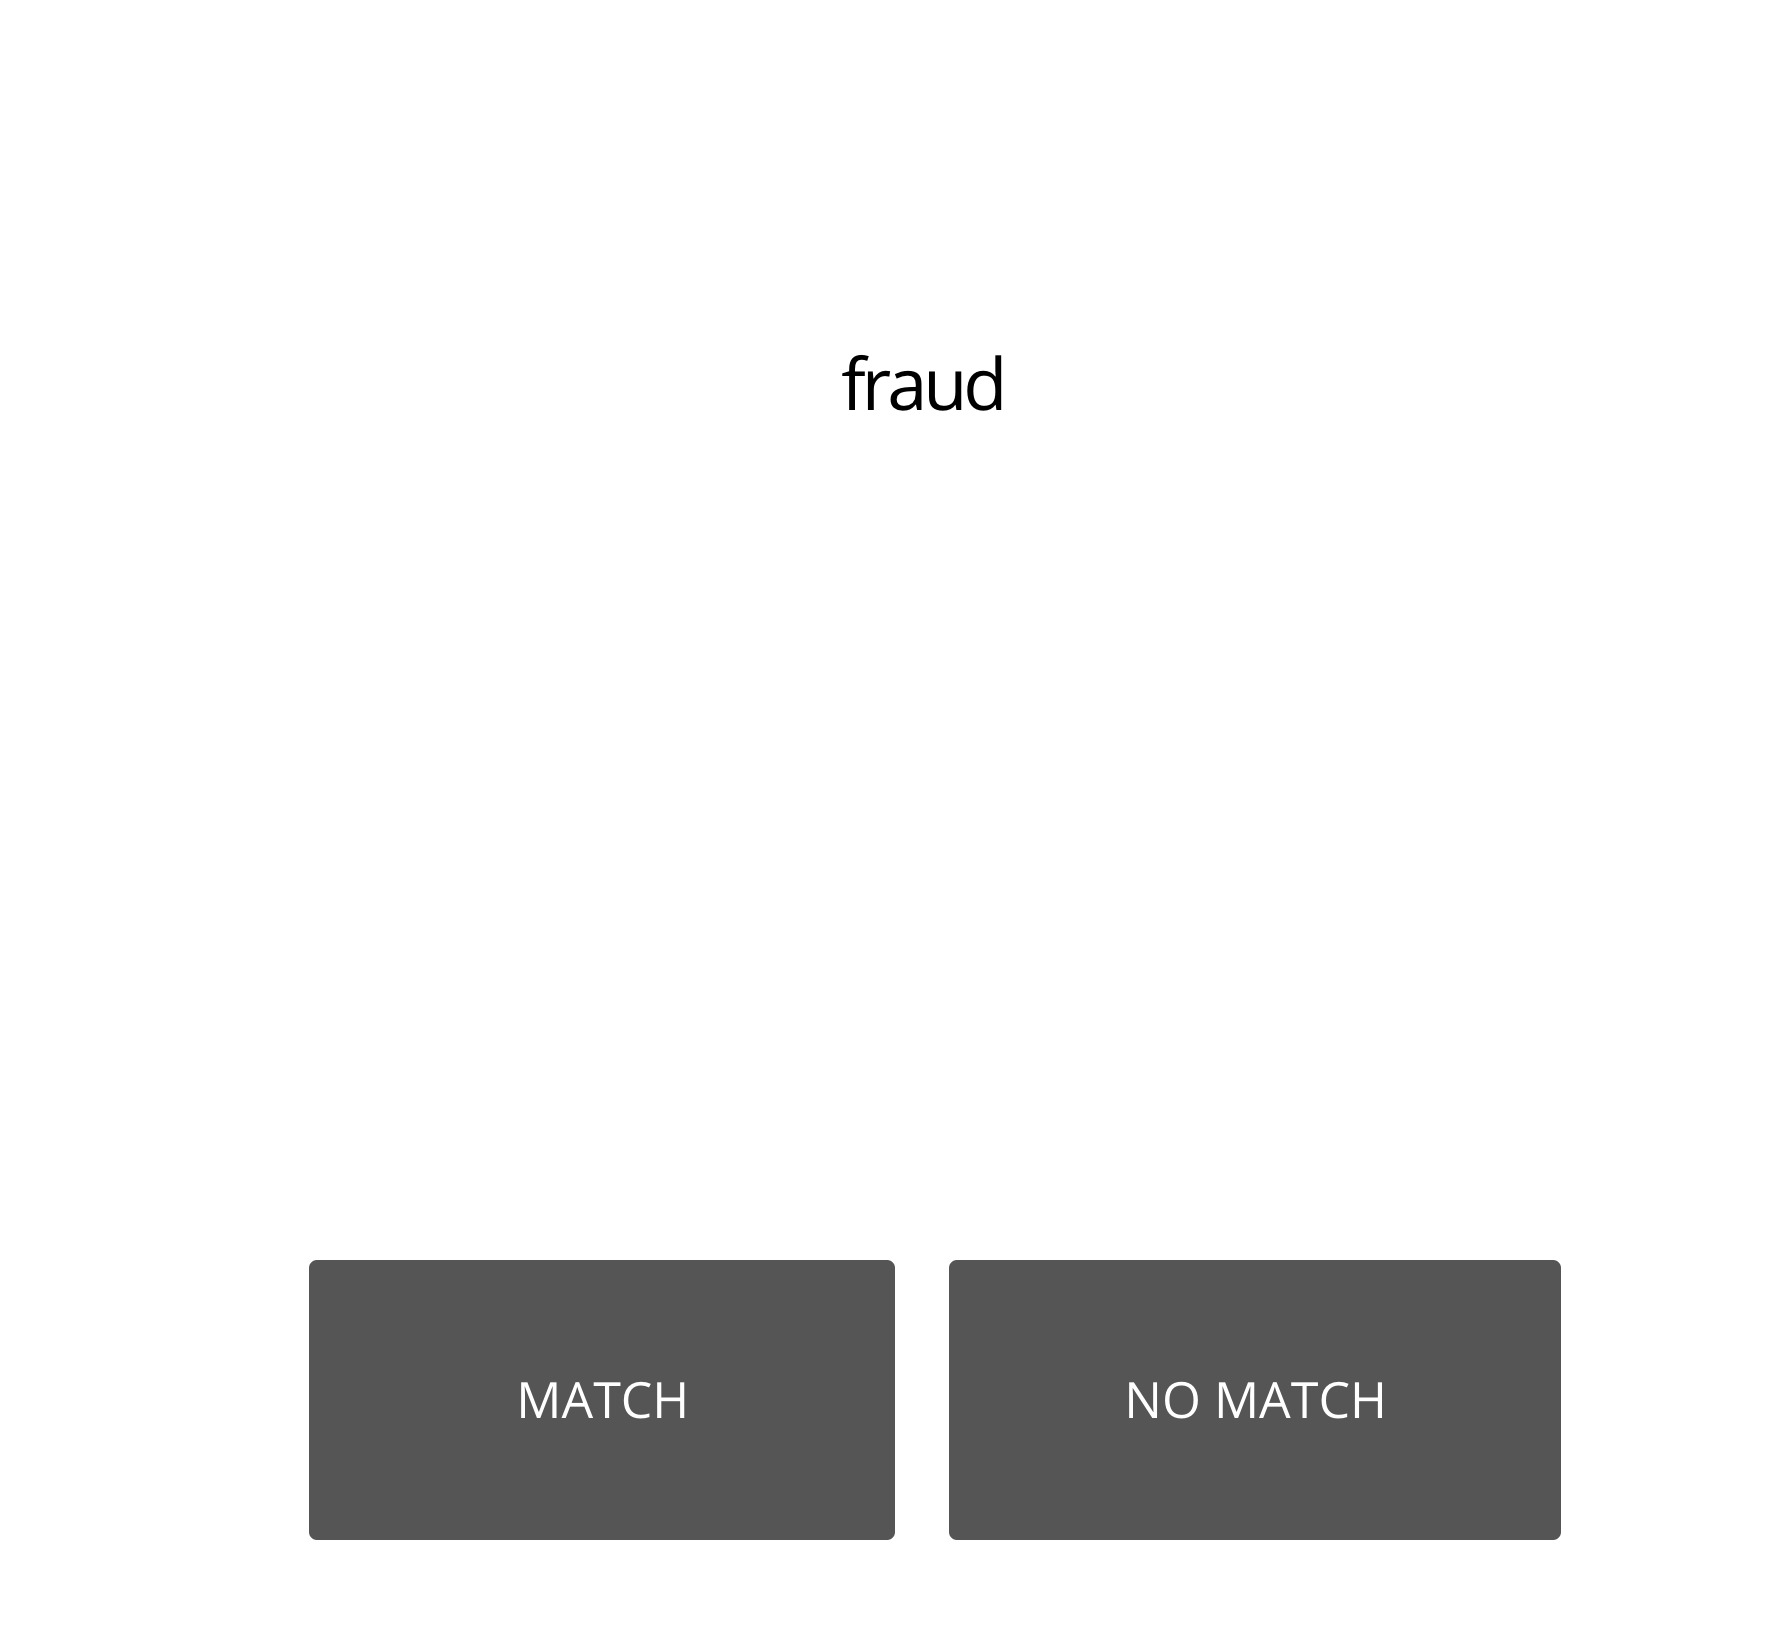

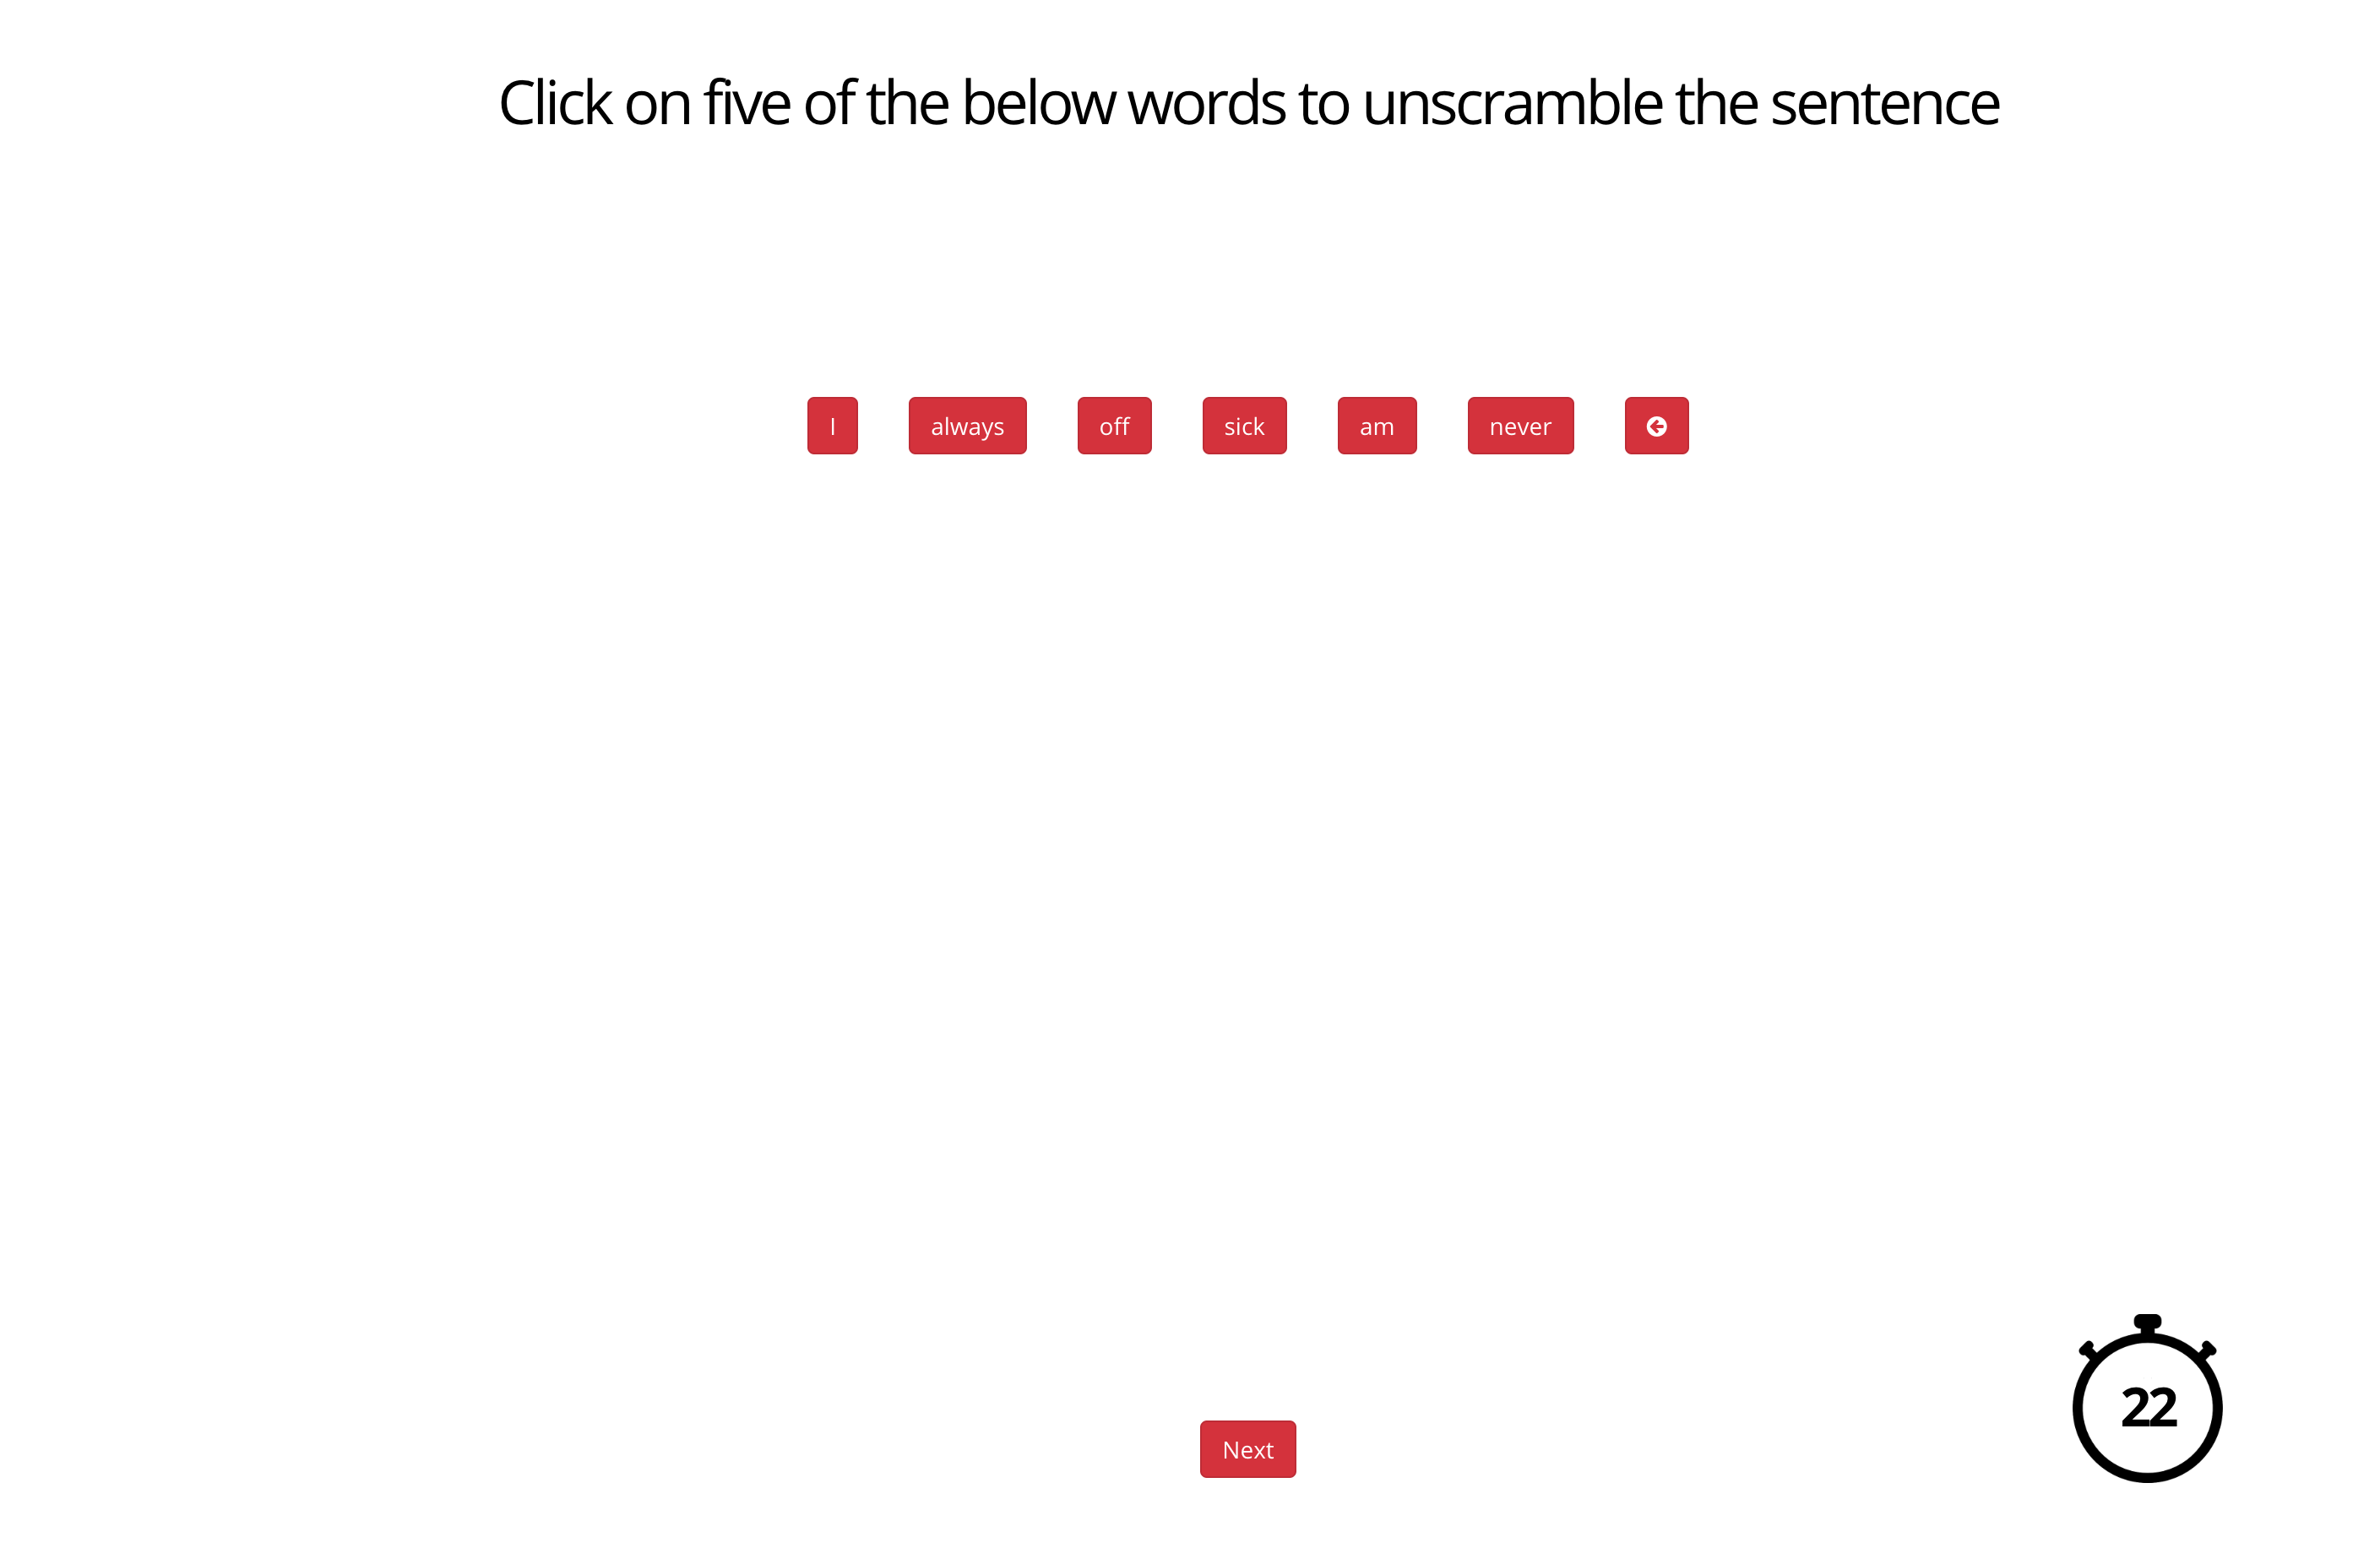

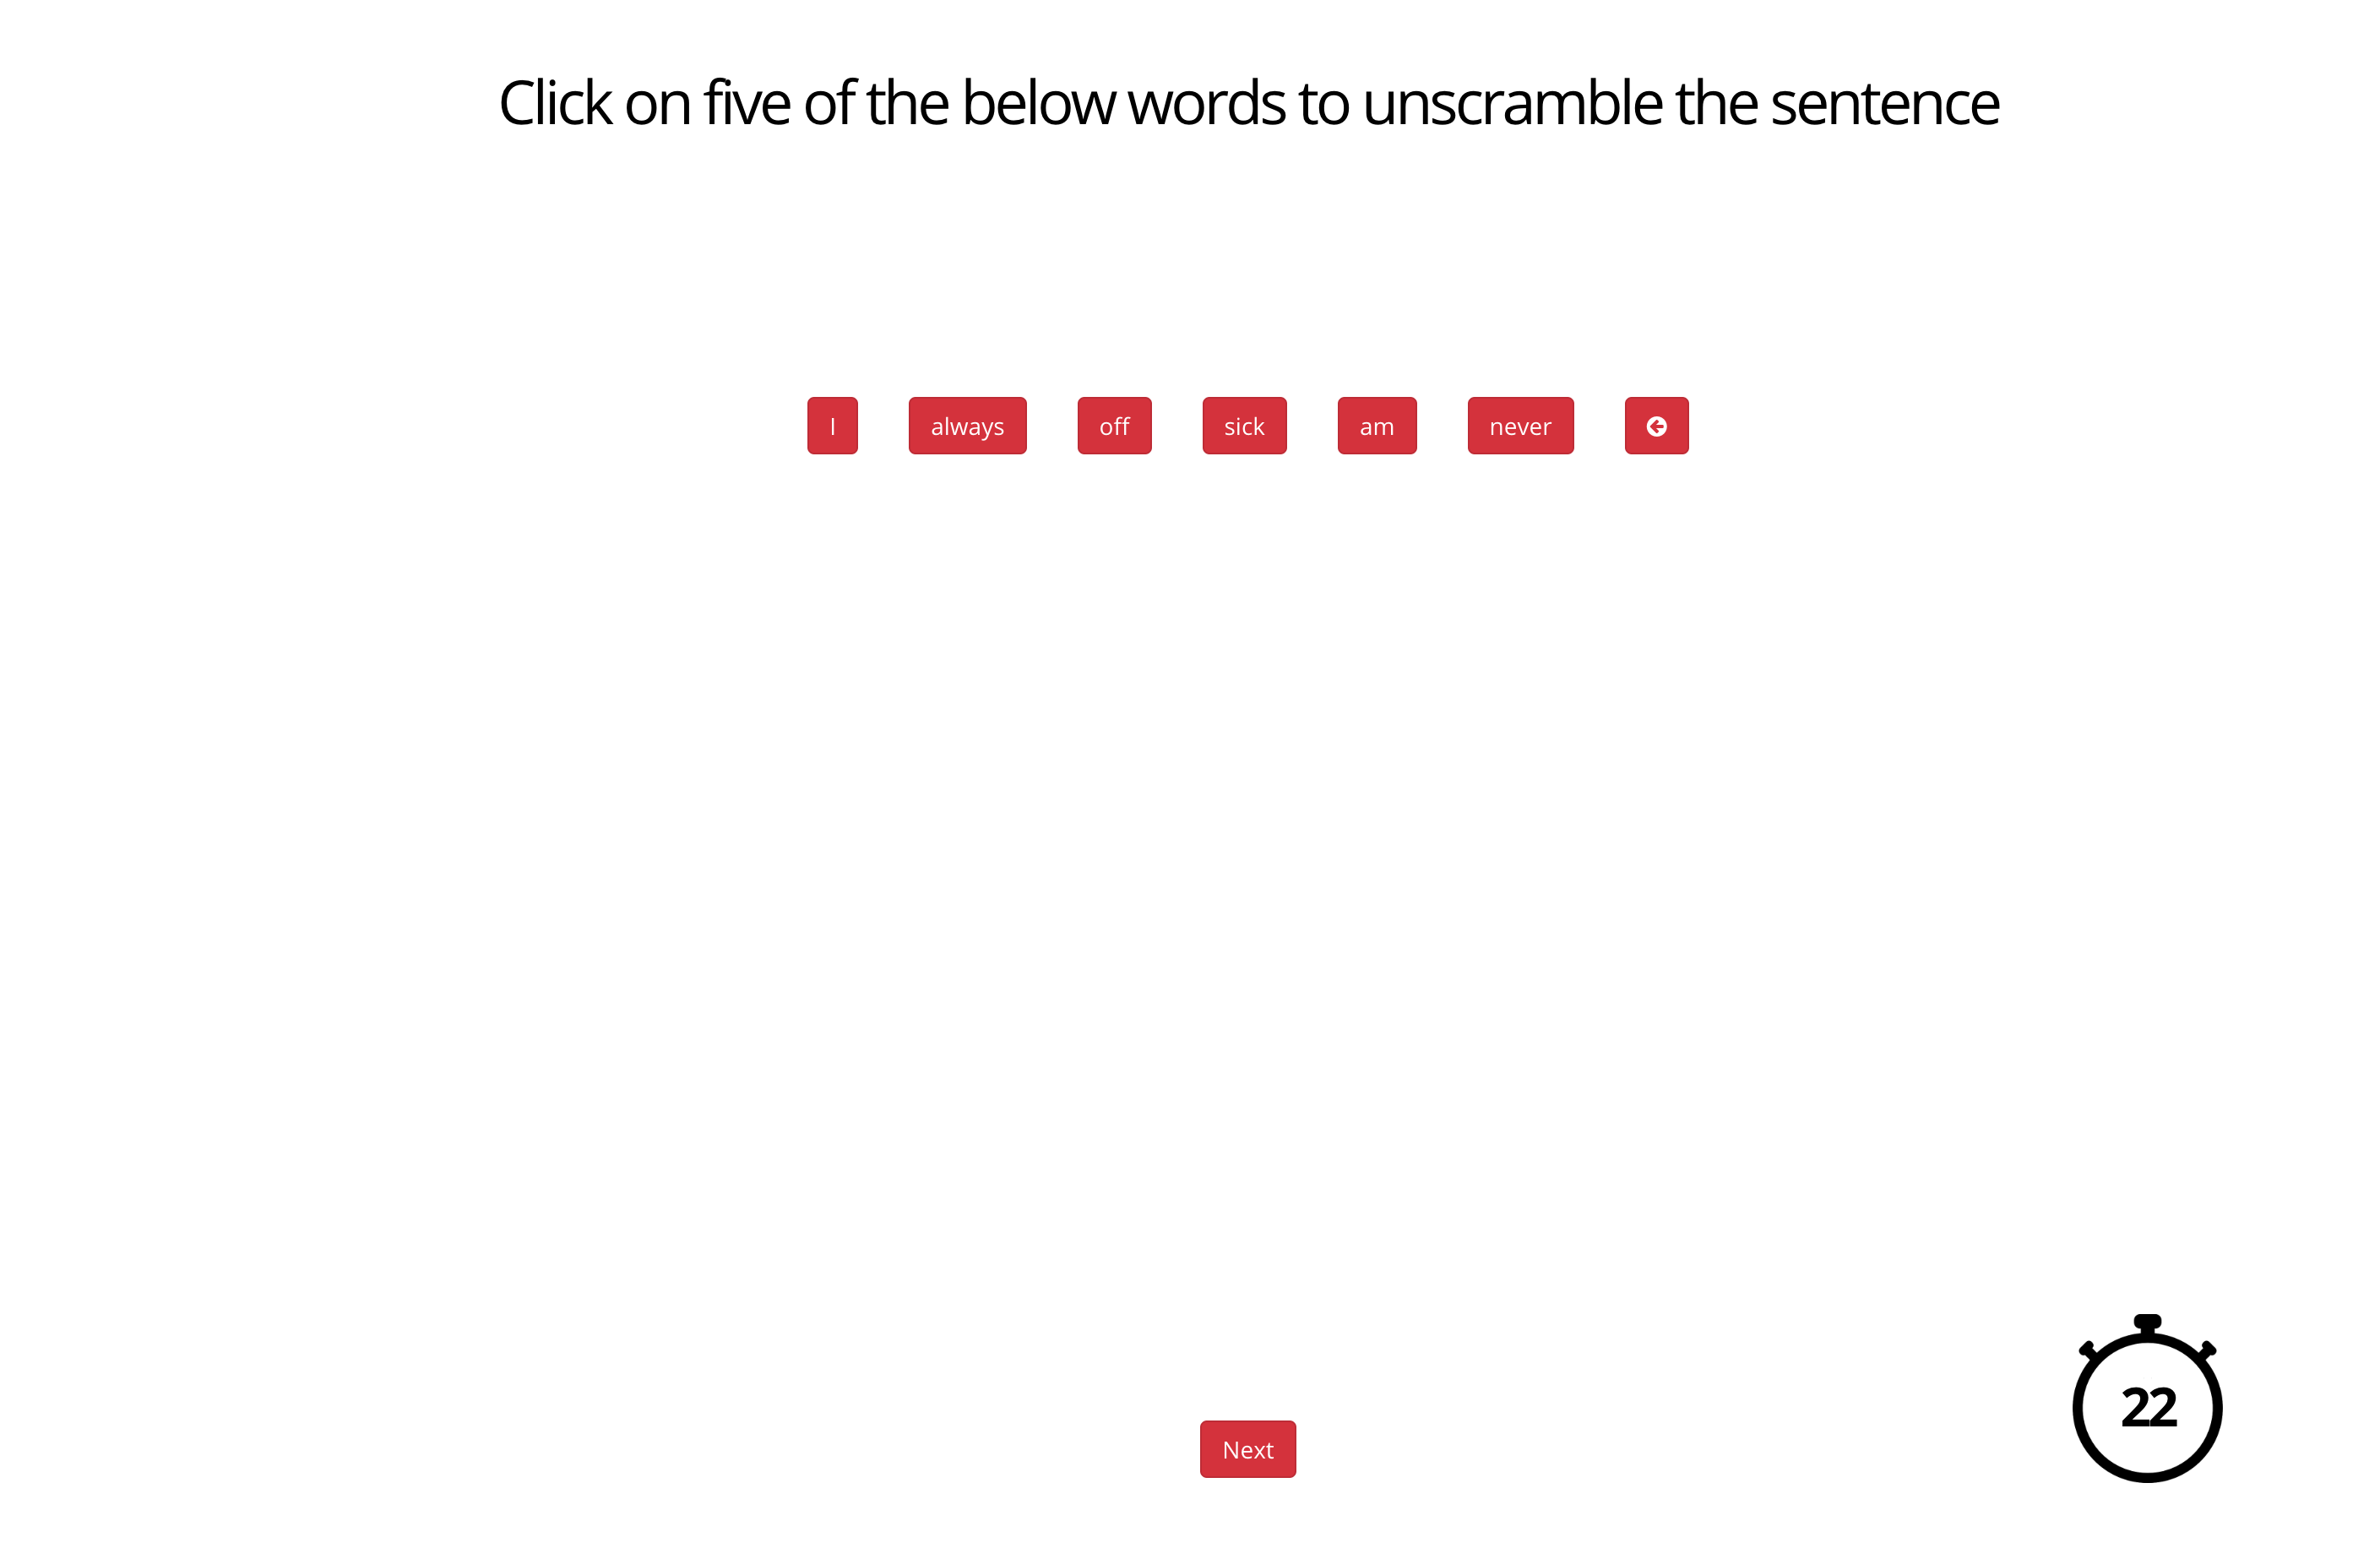


**R Packages**

General linear models were conducted using the stats package (13). Linear mixed models were conducted using the lme4 package (14), and their effect sizes were calculated using the MuMIn package (15). Correlations were conducted using the apaTables package (16).

**Supplementary Results**

**Randomisation Checks**

There were no significant differences in participant age (*F*(1, 142) = 0.12, *p* = .727), gender (*χ 2*(2, *N* = 144) = 2.03, *p* = .361), country (*χ 2*(3, *N* = 144) = 2.05, *p* = .562), ethnicity (*χ 2*(6, *N* = 144) = 12.27, *p* = .056), or SES (*F*(1, 132) = 0.00, *p* = .970) across the different training groups. Similarly, there were no significant differences in baseline participant self-rated rumination (*F*(1, 140) = 0.48, *p* = .489), depressive symptoms (*F*(1, 141) = 0.49, *p* = .487), anxiety symptoms (*F*(1, 140) = 2.83, *p* = .095), social sensitivity (*F*(1, 121) = 3.85, *p* = .052), or social risk concern (*F*(1, 142) = 0.65, *p* = .421) across the training groups, indicating successful randomization of participants.

**Table S1**

*Summary of H2a Analyses*

|  | **Affective control** | | | |
| --- | --- | --- | --- | --- |
| *Predictors* | *df* | *F* | *p* | *R2m/R2c* |
|  |  |  |  | 0.02/0.32 |
| Time | 107.00 | 0.04 | .845 |  |
| App usage | 192.77 | 0.22 | .636 |  |
| Days since training | 106.00 | 0.48 | .488 |  |
| Time x App usage | 107.00 | 0.84 | .361 |  |

*Note*. Bolded text indicates statistically significant effects. **Time** indicates time point of measure completion (baseline vs post-training). **App usage** indicates average time (mins) spent in the assigned training app in total. **Days since training** indicates time between training completion and post task measure completion. **Affective control** was operationalised as average RT on correct trials of the emotional 2-back task minus average RT on correct trials of the neutral 2-back task (measured at baseline and post-training).

**Table S2**

*Summary of H2b Analyses*

|  | **Interpretation bias** | | | |
| --- | --- | --- | --- | --- |
| *Predictors* | *df* | *F* | *p* | *R2m/R2c* |
|  |  |  |  | 0.07/0.69 |
| Time | 105.83 | 3.21 | .076 |  |
| App usage | **145.60** | **5.25** | **.023** |  |
| Days since training | **105.89** | **4.03** | **.047** |  |
| Time x App usage | 105.30 | 2.19 | .142 |  |

*Note*. Bolded text indicates statistically significant effects. **Time** indicates time point of measure completion (baseline vs post-training). **App usage** indicates average time (mins) spent in the assigned training app in total. **Days since training** indicates time between training completion and post task measure completion. **Interpretation bias** was operationalised as the proportion of negative grammatically correct sentences in the Scrambled Sentences Task (measured at baseline and post-training).

**Table S3**

*Summary of H2c Analyses*

|  | **Interpretation bias** | | | |
| --- | --- | --- | --- | --- |
| *Predictors* | *df* | *F* | *p* | *R2m/R2c* |
|  |  |  |  | 0.13/0.72 |
| Time | 103.05 | 0.04 | .848 |  |
| App usage | 141.05 | 0.34 | .558 |  |
| Training group | **144.63** | **5.06** | **.026** |  |
| Days since training | **103.89** | **4.51** | **.036** |  |
| Time x App usage | 103.05 | 0.12 | .733 |  |
| Time x Training group | 103.99 | 1.67 | .199 |  |
| App usage x Training group | 142.86 | 1.07 | .303 |  |
| Time x App usage x Training group | 103.49 | 2.66 | .106 |  |

*Note*. Bolded text indicates statistically significant effects. **Time** indicates time point of measure completion (baseline vs post-training). **App usage** (mins) indicates average time (mins) spent in the assigned training app in total. **Training group** indicates app training group (SBT vs AffeCT). **Days since training** indicates time between training completion and post task measure completion. **Interpretation bias** was operationalised as the proportion of negative grammatically correct sentences in the Scrambled Sentences Task (measured at baseline and post-training).

**Table S4**

*Summary of exploratory H2a 2-back performance analysis*

|  | **2-back RT** | | | |
| --- | --- | --- | --- | --- |
| *Predictors* | *df* | *F* | *p* | *R2m/R2c* |
|  |  |  |  | 0.18/0.70 |
| Time | **325.00** | **21.76** | **<.001** |  |
| App usage | **133.42** | **24.19** | **<.001** |  |
| Days since training | **106.00** | **6.61** | **.012** |  |
| Time x App usage | 325.00 | 0.49 | .485 |  |

*Note*. Bolded text indicates statistically significant effects. **Time** indicates time point of measure completion (baseline vs post-training). **App usage** (mins) indicates average time (mins) spent in the assigned training app in total. **Days since training** indicates time between training completion and post task measure completion. **2-back RT** indicates reaction time on correct trials of the untrained 2-back task.

**Table S5**

*Exploratory effects of time (baseline vs post-training) on outcomes of interest*

| ***A:*** *Effect of time on emotion regulation* | | | | | | | | |
| --- | --- | --- | --- | --- | --- | --- | --- | --- |
|  | **Emotion Regulation** | | | | | | | |
| *Predictors* | *df* | | *F* | | *p* | | *R2m/R2c* | |
|  |  | |  | |  | | 0.00/0.65 | |
| Time | 114.84 | | 0.17 | | .685 | |  | |
| ***B:*** *Effect of time on rumination* | | | | | | | | |
|  | | **Rumination** | | | | | | |
| *Predictors* | | *df* | | *F* | | *p* | | *R2m/R2c* |
|  | |  | |  | |  | | 0.02/0.61 |
| Time | | 116.22 | | 9.06 | | .003 | |  |
| ***C:*** *Effect of time on depression* | | | | | | | | |
|  | | **Depression** | | | | | | |
| *Predictors* | | *df* | | *F* | | *p* | | *R2m/R2c* |
|  | |  | |  | |  | | 0.00/0.90 |
| Time | | 107.99 | | 0.42 | | .516 | |  |
| ***D:*** *Effect of time on anxiety* | | | | | | | | |
|  | | **Anxiety** | | | | | | |
| *Predictors* | | *df* | | *F* | | *p* | | *R2m/R2c* |
|  | |  | |  | |  | | 0.00/0.83 |
| Time | | 109.08 | | 0.97 | | .328 | |  |

*Note*. Bolded text indicates statistically significant effects (*p* < .003). **Time** indicates time point of measure completion (baseline vs post-training). **Emotion Regulation** was operationalised as total score on ERQ reappraisal subscale. **Rumination** was operationalised as total score on the RTQ. **Depression** was operationalised as total score on PHQ. **Anxiety** was operationalised as total score on GAD.

**Table S6**

*Exploratory effects of time (baseline vs post-training vs follow-up) on outcomes of interest*

| ***A:*** *Effect of time on emotion regulation* | | | | | | | | |
| --- | --- | --- | --- | --- | --- | --- | --- | --- |
|  | **Emotion Regulation** | | | | | | | |
| *Predictors* | *df* | | *F* | | *p* | | *R2m/R2c* | |
|  |  | |  | |  | | 0.00/0.61 | |
| Time | 211.20 | | 1.36 | | .259 | |  | |
| ***B:*** *Effect of time on rumination* | | | | | | | | |
|  | | **Rumination** | | | | | | |
| *Predictors* | | *df* | | *F* | | *p* | | *R2m/R2c* |
|  | |  | |  | |  | | 0.03/0.60 |
| Time | | **213.12** | | **12.81** | | **<.001** | |  |
| ***C:*** *Effect of time on depression* | | | | | | | | |
|  | | **Depression** | | | | | | |
| *Predictors* | | *df* | | *F* | | *p* | | *R2m/R2c* |
|  | |  | |  | |  | | 0.00/0.86 |
| Time | | 204.07 | | 0.42 | | .656 | |  |
| ***D:*** *Effect of time on anxiety* | | | | | | | | |
|  | | **Anxiety** | | | | | | |
| *Predictors* | | *df* | | *F* | | *p* | | *R2m/R2c* |
|  | |  | |  | |  | | 0.00/0.81 |
| Time | | 204.94 | | 0.48 | | .619 | |  |

*Note*. Bolded text indicates statistically significant effects (*p* < .003). **Time** indicates time point of measure completion (baseline vs post-training vs follow-up). **Emotion Regulation** was operationalised as total score on ERQ reappraisal subscale. **Rumination** was operationalised as total score on the RTQ. **Depression** was operationalised as total score on PHQ. **Anxiety** was operationalised as total score on GAD.

**Figure S3**

*Exploratory effect of time (baseline vs post-training vs follow-up) on rumination*

**
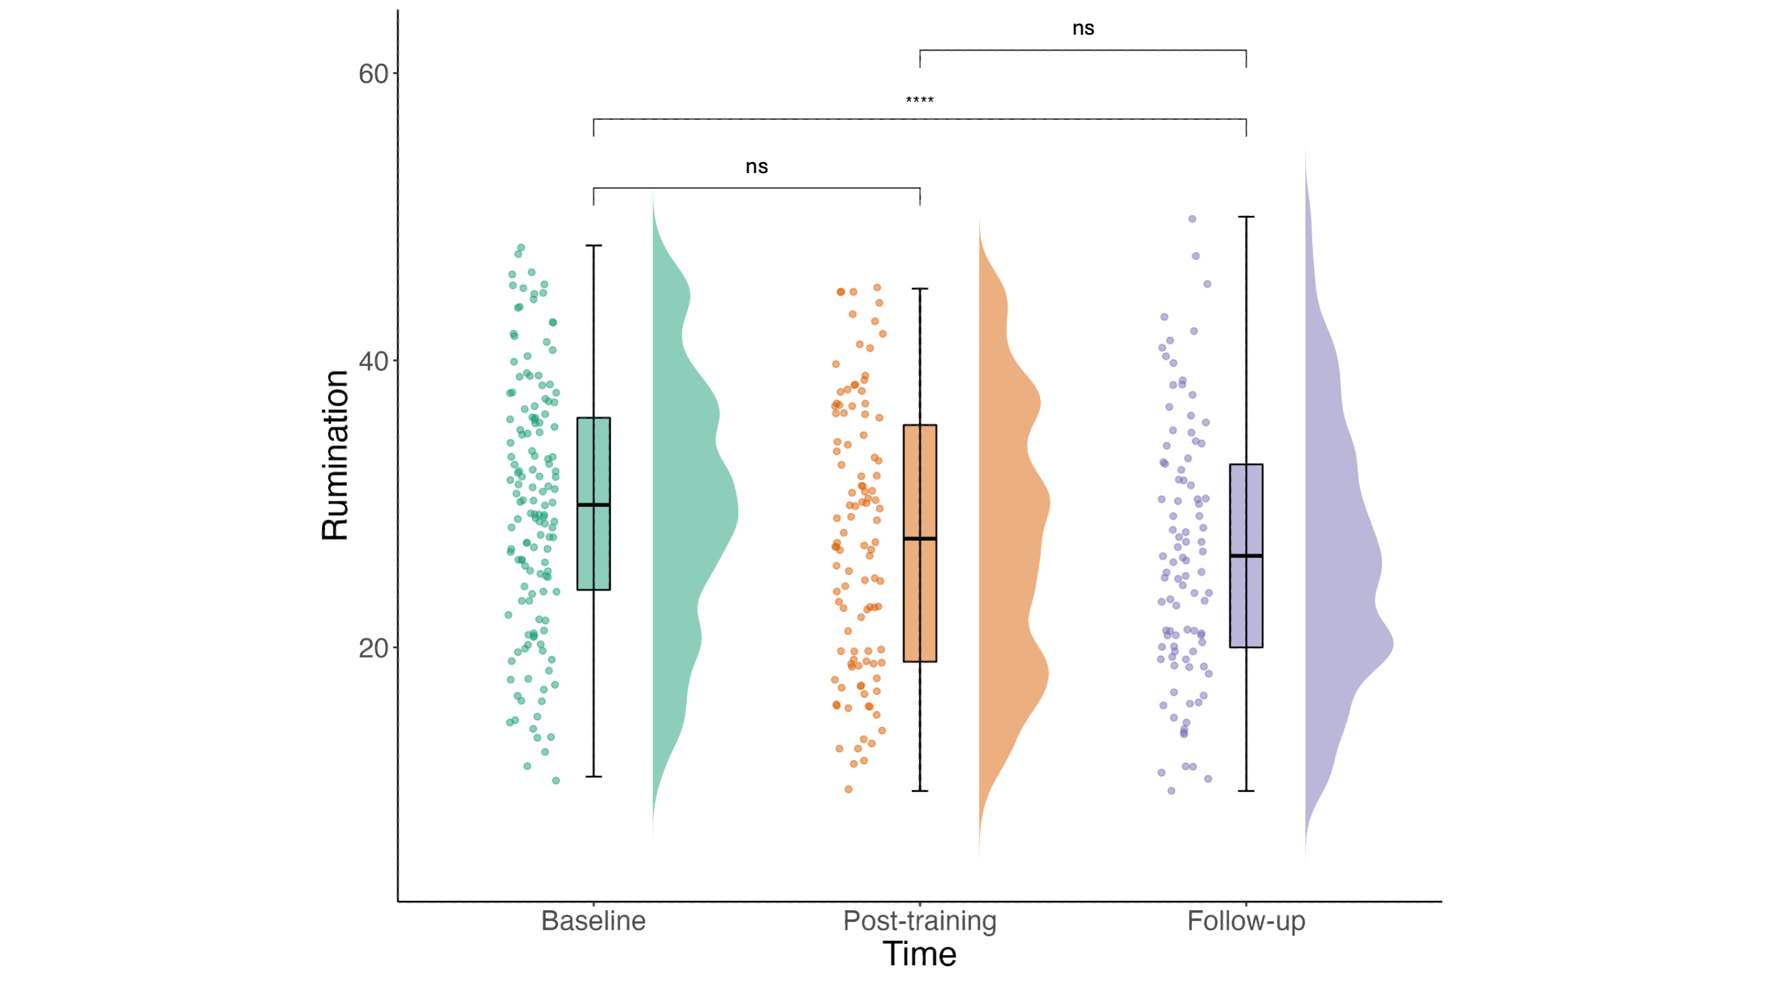
**

*Note*. Effect of time (baseline vs pos-training vs follow-up) on self-rated rumination. Rumination was operationalised as total score on the RTQ.

**Table S7**

*Exploratory effects of time (baseline vs post-training) and training group (SBT vs AffeCT) on outcomes of interest*

| ***A:*** *Effect of time and training group on emotion regulation* | | | | |
| --- | --- | --- | --- | --- |
|  | **Emotion Regulation** | | | |
| *Predictors* | *df* | *F* | *p* | *R2m/R2c* |
|  |  |  |  | 0.02/0.66 |
| Time | 115.94 | 1.42 | .236 |  |
| Training group | 184.79 | 3.77 | .054 |  |
| Time x Training group | 114.03 | 3.84 | .053 |  |
| ***B:*** *Effect of time and training group on rumination* | | | | |
|  | **Rumination** | | | |
| *Predictors* | *df* | *F* | *p* | *R2m/R2c* |
|  |  |  |  | 0.02/0.61 |
| Time | 117.94 | 4.48 | .036 |  |
| Training group | 191.85 | 0.31 | .578 |  |
| Time x Training group | 115.73 | 0.03 | .860 |  |
| ***C:*** *Effect of time and training group on depression* | | | | |
|  | **Depression** | | | |
| *Predictors* | *df* | *F* | *p* | *R2m/R2c* |
|  |  |  |  | 0.01/0.90 |
| Time | 107.22 | 2.45 | .121 |  |
| Training group | 153.46 | 0.61 | .435 |  |
| Time x Training group | 106.97 | 2.26 | .135 |  |
| ***D:*** *Effect of time and training group on anxiety* | | | | |
|  | **Anxiety** | | | |
| *Predictors* | *df* | *F* | *p* | *R2m/R2c* |
|  |  |  |  | 0.01/0.83 |
| Time | 108.86 | 0.01 | .914 |  |
| Training group | 161.72 | 2.44 | .120 |  |
| Time x Training group | 108.18 | 0.56 | .455 |  |

*Note*. Bolded text indicates statistically significant effects (*p* < .003). **Time** indicates time point of measure completion (baseline vs post-training). **Emotion Regulation** was operationalised as total score on ERQ reappraisal subscale. **Rumination** was operationalised as total score on the RTQ. **Depression** was operationalised as total score on PHQ. **Anxiety** was operationalised as total score on GAD.

**Table S8**

*Exploratory effects of time (baseline vs post-training vs follow-up) and training group (SBT vs AffeCT) on outcomes of interest*

| ***A:*** *Effect of time and training group on emotion regulation* | | | | |
| --- | --- | --- | --- | --- |
|  | **Emotion Regulation** | | | |
| *Predictors* | *df* | *F* | *p* | *R2m/R2c* |
|  |  |  |  | 0.00/0.65 |
| Time | 211.26 | 3.85 | .023 |  |
| Training group | 283.02 | 0.47 | .495 |  |
| Time x Training group | 209.35 | 3.49 | .032 |  |
| ***B:*** *Effect of time and training group on rumination* | | | | |
|  | **Rumination** | | | |
| *Predictors* | *df* | *F* | *p* | *R2m/R2c* |
|  |  |  |  | 0.04/0.61 |
| Time | **213.93** | **9.79** | **<.001** |  |
| Training group | 288.48 | 3.22 | .074 |  |
| Time x Training group | 211.50 | 1.14 | .322 |  |
| ***C:*** *Effect of time and training group on depression* | | | | |
|  | **Depression** | | | |
| *Predictors* | *df* | *F* | *p* | *R2m/R2c* |
|  |  |  |  | 0.02/0.86 |
| Time | 202.71 | 1.82 | .164 |  |
| Training group | 199.86 | 4.43 | .037 |  |
| Time x Training group | 202.11 | 2.58 | .078 |  |
| ***D:*** *Effect of time and training group on anxiety* | | | | |
|  | **Anxiety** | | | |
| *Predictors* | *df* | *F* | *p* | *R2m/R2c* |
|  |  |  |  | 0.02/0.81 |
| Time | 204.00 | 0.16 | .853 |  |
| Training group | 218.78 | 2.88 | .091 |  |
| Time x Training group | 203.16 | 0.62 | .537 |  |

*Note*. Bolded text indicates statistically significant effects (*p* < .003). **Time** indicates time point of measure completion (baseline vs post-training vs follow-up). **Emotion Regulation** was operationalised as total score on ERQ reappraisal subscale. **Rumination** was operationalised as total score on the RTQ. **Depression** was operationalised as total score on PHQ. **Anxiety** was operationalised as total score on GAD.

**Table S9**

*Summary of H3a Analyses*

| ***A:*** *H3a Analyses: Emotion Regulation* | | | | | | | | |
| --- | --- | --- | --- | --- | --- | --- | --- | --- |
|  | **Emotion Regulation** | | | | | | | |
| *Predictors* | *df* | | *F* | | *p* | | *R2m/R2c* | |
|  |  | |  | |  | | 0.04/0.66 | |
| Time | 100.29 | | 2.29 | | .133 | |  | |
| Training group | 145.31 | | 3.10 | | .080 | |  | |
| Affective control change | 143.62 | | 0.47 | | .494 | |  | |
| Days since training | 121.50 | | 2.60 | | .109 | |  | |
| Time x Training group | 100.05 | | 3.37 | | .069 | |  | |
| Time x Affective control change | 98.27 | | 0.60 | | .442 | |  | |
| Training group x Affective control change | 144.08 | | 0.27 | | .602 | |  | |
| Time x Training group x Affective control change | 98.31 | | 0.00 | | .972 | |  | |
| ***B:*** *H3a Analyses: Rumination* | | | | | | | | |
|  | | **Rumination** | | | | | | |
| *Predictors* | | *df* | | *F* | | *p* | | *R2m/R2c* |
|  | |  | |  | |  | | 0.06/0.61 |
| Time | | 101.10 | | 5.04 | | .027 | |  |
| Training group | | 154.63 | | 0.04 | | .848 | |  |
| Affective control change | | 155.34 | | 2.03 | | .156 | |  |
| Days since training | | 125.81 | | 0.54 | | .464 | |  |
| Time x Training group | | 100.59 | | 0.02 | | .898 | |  |
| Time x Affective control change | | 99.58 | | 0.22 | | .640 | |  |
| Training group x Affective control change | | 154.51 | | 2.78 | | .098 | |  |
| Time x Training group x Affective control change | | 99.88 | | 0.97 | | .326 | |  |

*Note*. Bolded text indicates statistically significant effects. **Time** indicates time point of measure completion (baseline vs post-training). **Training group** indicates app training group (SBT vs AffeCT). **Affective control change** was operationalised as change in average RT on correct trials of the emotional minus neutral 2-back task (Gorilla) from baseline to post-training. **Days since training** indicates time between training completion and post task measure completion. **Emotion Regulation** was operationalised as total score on ERQ reappraisal subscale. **Rumination** was operationalised as total score on the RTQ.

**Table S10**

*Summary of H3b Analyses*

| ***A:*** *H3b Analyses:**Affective Control and Depressive Symptoms* | | | | |
| --- | --- | --- | --- | --- |
|  | **Depression** | | | |
| *Predictors* | *df* | *F* | *p* | *R2m/R2c* |
|  |  |  |  | 0.04/0.89 |
| Time | 99.30 | 1.01 | .318 |  |
| Training group | 116.75 | 0.80 | .372 |  |
| Affective control change | 116.09 | 0.19 | .666 |  |
| Days since training | 110.18 | 2.51 | .116 |  |
| Time x Training group | 99.66 | 1.31 | .256 |  |
| Time x Affective control change | 99.03 | 0.40 | .527 |  |
| Training group x Affective control change | 116.89 | 0.06 | .810 |  |
| Time x Training group x Affective control change | 99.27 | 0.82 | .368 |  |
| ***B:*** *H3b Analyses:**Interpretation Bias and Depressive Symptoms* | | | | |
|  | **Depression** | | | |
| *Predictors* | *df* | *F* | *p* | *R2m/R2c* |
|  |  |  |  | 0.06/0.89 |
| Time | 97.31 | 0.86 | .355 |  |
| Training group | 114.52 | 0.02 | .875 |  |
| Interpretation bias change | 114.37 | 0.13 | .716 |  |
| Days since training | 108.25 | 3.76 | .055 |  |
| Time x Training group | 97.28 | 2.04 | .157 |  |
| Time x Interpretation bias change | 97.26 | 0.44 | .507 |  |
| Training group x Interpretation bias change | 114.43 | 0.82 | .367 |  |
| Time x Training group x Interpretation bias change | 97.65 | 0.05 | .821 |  |
| ***C:*** *H3b Analyses:**Affective Control and Anxiety Symptoms* | | | | |
|  | **Anxiety** | | | |
| *Predictors* | *df* | *F* | *p* | *R2m/R2c* |
|  |  |  |  | 0.05/0.81 |
| Time | 99.26 | 0.02 | .880 |  |
| Training group | 126.47 | 1.91 | .170 |  |
| Affective control change | 125.07 | 0.01 | .904 |  |
| Days since training | 114.02 | 3.40 | .068 |  |
| Time x Training group | 99.23 | 0.53 | .468 |  |
| Time x Affective control change | 98.27 | 0.02 | .887 |  |
| Training group x Affective control change | 125.69 | 0.02 | .890 |  |
| Time x Training group x Affective control change | 98.30 | 0.23 | .631 |  |
| ***D:*** *H3b Analyses:**Interpretation Bias and Anxiety Symptoms* | | | | |
|  | **Anxiety** | | | |
|  |  |  |  | 0.06/0.82 |
| Time | 97.33 | 0.03 | .853 |  |
| Training group | 122.89 | 0.52 | .470 |  |
| Interpretation bias change | 122.47 | 0.34 | .563 |  |
| Days since training | **111.69** | **4.94** | **.028** |  |
| Time x Training group | 96.83 | 0.00 | .992 |  |
| Time x Interpretation bias change | 96.79 | 2.25 | .137 |  |
| Training group x Interpretation bias change | 124.18 | 0.37 | .545 |  |
| Time x Training group x Interpretation bias change | 97.23 | 0.01 | .936 |  |

*Note*. Bolded text indicates statistically significant effects. **Time** indicates time point of measure completion (baseline vs post-training). **Training group** indicates app training group (SBT vs AffeCT). **Affective control change** was operationalised as change in average RT on correct trials of the emotional minus neutral 2-back task (Gorilla) from baseline to post-training. **Interpretation Bias Change** was operationalised as change in proportion of negative grammatically correct sentences in the SST from baseline to post-training. **Days since training** indicates time between training completion and post task measure completion. **Depression** was operationalised as total score on PHQ. **Anxiety** was operationalised as total score on GAD.

**Table S11**

*Full sample characteristics (N = 240), means and standard deviations of variables*

|  | ***Mean (SD)/N (%)*** |
| --- | --- |
| **Age (years)** | 14.70 (1.18) |
| **SES** | 2.77 (0.33) |
| **Gender** |  |
| Female | 102 (42.50%) |
| Male | 136 (56.67%) |
| Non-binary | 2 (0.83%) |
| **Country** |  |
| Australia | 114 (47.50%) |
| United Kingdom | 79 (32.92%) |
| United States of America | 45 (18.75%) |
| India | 2 (0.83%) |
| **Ethnicity** |  |
| Aboriginal or Torres Strait Islander | 2 (0.83%) |
| Asian | 27 (11.25%) |
| Black | 29 (12.08%) |
| Hispanic | 1 (0.42%) |
| White | 166 (69.17%) |
| Mixed | 10 (4.17%) |
| Other | 4 (1.67%) |
| Prefer not to say | 1 (0.42%) |
| **Education** |  |
| Current student | 238 (99.17%) |
| Prefer not to say | 2 (0.83%) |
| **Baseline Measures** |  |
| **Affective Control** | -0.86 (203.56) |
| **Interpretation Bias** | 0.31 (0.21) |
| **Emotion Regulation** | 29.64 (6.33) |
| **Rumination** | 32.71 (8.52) |
| **Depression** | 6.40 (6.06) |
| **Anxiety** | 6.75 (5.73) |
| **Social Sensitivity** | 27.77 (9.54) |
| **Social Risk Concern** | 44.96 (17.31) |
| **Post Training Measures** |  |
| **Affective Control** | 11.29 (162.23) |
| **Interpretation Bias** | 0.23 (0.20) |
| **Emotion Regulation** | 30.19 (6.25) |
| **Rumination** | 31.33 (9.13) |
| **Depression** | 5.30 (5.38) |
| **Anxiety** | 5.43 (5.33) |
| **Social Sensitivity** | 27.47 (10.04) |
| **Social Risk Concern** | 43.97 (15.34) |
| **Affective Control Change** | -14.62 (211.85) |
| **Interpretation Bias Change** | 0.06 (0.19) |
| **1-month Follow-up Measures** |  |
| **Emotion Regulation** | 29.45 (6.69) |
| **Rumination** | 31.61 (10.05) |
| **Depression** | 6.84 (6.80) |
| **Anxiety** | 6.87 (6.21) |
| **Social Sensitivity** | 28.15 (9.18) |
| **Social Risk Concern** | 44.20 (14.30) |
| **SBT Training (*n = 124*)** |  |
| **SBT app usage** | 59.73 (67.24) |
| **SBT app sessions** | 6.61 (7.27) |
| **SBT n-back usage** | 80.16 (56.61) |
| **SBT max N** | 3.29 (1.92) |
| **SBT mean N** | 2.01 (1.07) |
| **SBT CBMI usage** | 45.15 (53.48) |
| **SBT CBMI RT** | 3800.96 (599.38) |
| **SBT CBMI accuracy** | 44.63 (34.13) |
| **SBT psychoed usage** | 20.77 (25.31) |
| **AffeCT Training (*n = 116*)** |  |
| **AffeCT app usage** | 40.58 (81.82) |
| **AffeCT app sessions** | 3.62 (7.08) |
| **AffeCT n-back usage** | 102.28 (89.72) |
| **AffeCT max N** | 2.94 (2.49) |
| **AffeCT mean N** | 1.68 (1.13) |

*Note*. **SES** = socio-economic status, derived from the average level of parental education for up to 2 parents (1 = primary school; 2 = high school, professional/vocational training; 3 = university). **Affective Control** =average RT on correct trials of the emotional 2-back task minus average RT on correct trials of the neutral 2-back task. **Interpretation Bias** = proportion of negative grammatically correct sentences in the Scrambled Sentences Task. **Emotion Regulation** = total score on ERQ reappraisal subscale. **Rumination** = total score on RTQ. **Depression** = total score on PHQ. **Anxiety** = total score on GAD. **Social Sensitivity** = total score on O2S3. **Social Risk Concern** = Average score of HSRQ rating scales. **Affective Control** **Change** = change in average RT on correct trials of the emotional minus neutral 2-back task (Gorilla) from baseline to post-training. **Interpretation Bias Change** = Change in proportion of negative grammatically correct sentences in the SST from baseline to post-training. **App usage** = average time (mins) spent in the assigned training app in total. **App sessions** = average number of training sessions completed in the assigned training app in total. **N-back usage** = amount of time (mins) spent training on the n-back task of the assigned training app. **Max N** = maximum N reached across all trials of the assigned training app. **Mean N** = average N reached across all trials of the assigned training app. **CBMI usage** = total time (mins) spent on CBMI tasks in the SBT app across all SBT app sessions. **CBMI RT** = average RT (ms) on correct CBMI trials across all SBT app sessions. **CBMI accuracy** = total correct CBMI trials across all SBT app sessions. **Psychoed usage** = total time (mins) spent on psychoeducation components in the SBT app across all SBT app sessions.

**Table S12**

*Full Sample Summary of H1 Analyses*

| ***A:*** *H1 Analyses: App Usage* | | | | | |
| --- | --- | --- | --- | --- | --- |
|  | **App Usage** | | | | |
| *Predictors* | *dfregression* | *dfresidual* | *F* | *p* | *R2* |
| Training group | 1 | 238.00 | 3.11 | .079 | 0.01 |
| ***B:*** *H1 Analyses: N-back Usage (exploratory)* | | | | | |
|  | **N-back Usage** | | | | |
| *Predictors* |  | *df* | *F* | *p* | *R2* |
| Training group | 1 | 238.00 | 0.66 | .417 | -0.00 |
| ***B:*** *H1 Analyses: Session Number (exploratory)* | | | | | |
|  | **Session Number** | | | | |
| *Predictors* |  | *df* | *F* | *p* | *R2* |
| Training group | **1** | **238.00** | **10.17** | **.002** | **0.04** |

*Note*. Bolded text indicates statistically significant effects. **Training group** indicates app training group (SBT vs AffeCT). **App usage** indicates average time (mins) spent in the assigned training app in total. **N-back usage** indicates amount of time (mins) spent training on the n-back task of the assigned training app. **App sessions** indicates average number of training sessions completed in the assigned training app in total.

**Table S13**

*Full Sample Summary of H2 Analyses*

| ***A:*** *H2a Analyses* | | | | |
| --- | --- | --- | --- | --- |
|  | **Affective Control** | | | |
| *Predictors* | *df* | *F* | *p* | *R2m/R2c* |
|  |  |  |  | 0.01/0.24 |
| Time | 201.00 | 0.37 | .542 |  |
| App usage | 379.36 | 0.27 | .602 |  |
| Days since training | 200.00 | 0.29 | .589 |  |
| Time x App usage | 201.00 | 0.12 | .725 |  |
| ***B:*** *H2b Analyses* | | | | |
|  | **Interpretation Bias** | | | |
| *Predictors* | *df* | *F* | *p* | *R2m/R2c* |
|  |  |  |  | 0.06/0.57 |
| Time | **199.32** | **8.01** | **.005** |  |
| App usage | **306.28** | **10.94** | **.001** |  |
| Days since training | 199.74 | 1.47 | .227 |  |
| Time x App usage | 197.93 | 2.23 | .137 |  |
| ***C:*** *H2c Analyses* | | | | |
|  | **Interpretation Bias** | | | |
| *Predictors* | *df* | *F* | *p* | *R2m/R2c* |
|  |  |  |  | 0.08/0.58 |
| Time | 197.21 | 3.26 | .073 |  |
| App usage | 303.62 | 1.86 | .173 |  |
| Training group | 307.69 | 1.49 | .223 |  |
| Days since training | 197.74 | 1.43 | .233 |  |
| Time x App usage | 195.73 | 0.05 | .825 |  |
| Time x Training group | 197.31 | 0.08 | .778 |  |
| App usage x Training group | 305.63 | 1.27 | .262 |  |
| Time x App usage x Training group | 195.93 | 1.10 | .295 |  |

*Note*. Bolded text indicates statistically significant effects. **Time** indicates time point of measure completion (baseline vs post-training). **App usage** indicates average time (mins) spent in the assigned training app in total. **Training group** indicates app training group (SBT vs AffeCT). **Days since training** indicates time between training completion and post task measure completion. **Affective control** was operationalised as average RT on correct trials of the emotional 2-back task minus average RT on correct trials of the neutral 2-back task (measured at baseline and post-training). **Interpretation bias** was operationalised as the proportion of negative grammatically correct sentences in the Scrambled Sentences Task (measured at baseline and post-training).

**Table S14**

*Full Sample Summary of H3 Analyses*

| ***A:*** *H3a Analyses: Emotion Regulation* | | | | |
| --- | --- | --- | --- | --- |
|  | **Emotion Regulation** | | | |
| *Predictors* | *df* | *F* | *p* | *R2m/R2c* |
|  |  |  |  | 0.06/0.69 |
| Time | **192.75** | **8.82** | **.003** |  |
| Training group | 271.74 | 3.41 | .066 |  |
| Affective control change | 269.64 | 1.15 | .284 |  |
| Days since training | **227.84** | **17.05** | **<.001** |  |
| Time x Training group | **192.47** | **7.20** | **.008** |  |
| Time x Affective control change | 190.68 | 0.10 | .749 |  |
| Training group x Affective control change | 270.86 | 0.03 | .857 |  |
| Time x Training group x Affective control change | 190.88 | 0.08 | .781 |  |
| ***B:*** *H3a Analyses: Rumination* | | | | |
|  | **Rumination** | | | |
| *Predictors* | *df* | *F* | *p* | *R2m/R2c* |
|  |  |  |  | 0.07/0.60 |
| Time | **191.63** | **11.75** | **.001** |  |
| Training group | 298.62 | 0.13 | .718 |  |
| Affective control change | 296.30 | 0.79 | .375 |  |
| Days since training | **237.26** | **13.81** | **<.001** |  |
| Time x Training group | 191.90 | 1.04 | .310 |  |
| Time x Affective control change | 189.92 | 0.14 | .711 |  |
| Training group x Affective control change | 296.38 | 1.41 | .236 |  |
| Time x Training group x Affective control change | 190.89 | 0.43 | .513 |  |
| ***C:*** *H3b Analyses:**Affective Control and Depressive Symptoms* | | | | |
|  | **Depression** | | | |
| *Predictors* | *df* | *F* | *p* | *R2m/R2c* |
|  |  |  |  | 0.02/0.76 |
| Time | 193.10 | 0.38 | .537 |  |
| Training group | 251.95 | 1.61 | .206 |  |
| Affective control change | 250.20 | 0.08 | .778 |  |
| Days since training | 221.49 | 1.02 | .314 |  |
| Time x Training group | 193.59 | 0.06 | .803 |  |
| Time x Affective control change | 192.22 | 0.76 | .384 |  |
| Training group x Affective control change | 251.65 | 0.25 | .616 |  |
| Time x Training group x Affective control change | 192.69 | 1.13 | .288 |  |
| ***D:*** *H3b Analyses:**Interpretation Bias and Depressive Symptoms* | | | | |
|  | **Depression** | | | |
| *Predictors* | *df* | *F* | *p* | *R2m/R2c* |
|  |  |  |  | 0.02/0.76 |
| Time | 188.99 | 0.17 | .680 |  |
| Training group | 246.53 | 0.46 | .500 |  |
| Interpretation bias change | 246.96 | 0.00 | .946 |  |
| Days since training | 217.27 | 1.39 | .239 |  |
| Time x Training group | 188.80 | 0.05 | .816 |  |
| Time x Interpretation bias change | 188.74 | 0.06 | .800 |  |
| Training group x Interpretation bias change | 246.53 | 1.58 | .210 |  |
| Time x Training group x Interpretation bias change | 189.90 | 0.31 | .576 |  |
| ***E:*** *H3b Analyses:**Affective Control and Anxiety Symptoms* | | | | |
|  | **Anxiety** | | | |
| *Predictors* | *df* | *F* | *p* | *R2m/R2c* |
|  |  |  |  | 0.01/0.75 |
| Time | 192.59 | 1.68 | .196 |  |
| Training group | 253.88 | 0.08 | .779 |  |
| Affective control change | 251.04 | 0.16 | .686 |  |
| Days since training | 220.99 | 0.16 | .686 |  |
| Time x Training group | 192.80 | 0.09 | .765 |  |
| Time x Affective control change | 191.53 | 0.09 | .759 |  |
| Training group x Affective control change | 252.40 | 0.37 | .546 |  |
| Time x Training group x Affective control change | 191.71 | 0.16 | .691 |  |
| ***F:*** *H3b Analyses:**Interpretation Bias and Anxiety Symptoms* | | | | |
|  | **Anxiety** | | | |
|  |  |  |  | 0.02/0.75 |
| Time | 188.92 | 0.67 | .413 |  |
| Training group | 248.31 | 0.00 | .957 |  |
| Interpretation bias change | 246.69 | 1.78 | .184 |  |
| Days since training | 216.78 | 0.48 | .488 |  |
| Time x Training group | 188.48 | 0.18 | .669 |  |
| Time x Interpretation bias change | 187.88 | 1.73 | .190 |  |
| Training group x Interpretation bias change | 250.56 | 0.20 | .658 |  |
| Time x Training group x Interpretation bias change | 188.95 | 0.31 | .576 |  |

*Note*. Bolded text indicates statistically significant effects. **Time** indicates time point of measure completion (baseline vs post-training). **Training group** indicates app training group (SBT vs AffeCT). **Affective control change** was operationalised as change in average RT on correct trials of the emotional minus neutral 2-back task (Gorilla) from baseline to post-training. **Interpretation Bias Change** was operationalised as change in proportion of negative grammatically correct sentences in the SST from baseline to post-training. **Days since training** indicates time between training completion and post task measure completion. **Emotion Regulation** was operationalised as total score on ERQ reappraisal subscale. **Rumination** was operationalised as total score on the RTQ. **Depression** was operationalised as total score on PHQ. **Anxiety** was operationalised as total score on GAD.

References

1. Edwards EJ, Zec D, Campbell M, Hoorelbeke K, Koster EHW, Derakshan N, et al. Cognitive control training for children with anxiety and depression: A systematic review. Journal of Affective Disorders. 2022 Mar 1;300:158–71.

2. Beloe P, Derakshan N. Adaptive working memory training can reduce anxiety and depression vulnerability in adolescents. Dev Sci. 2019/03/31 ed. 2019 Mar 29;e12831.

3. Tsai YC, Liu CJ, Huang HC, Lin JH, Chen PY, Su YK, et al. A Meta-analysis of Dynamic Prevalence of Cognitive Deficits in the Acute, Subacute, and Chronic Phases After Traumatic Brain Injury. Journal of Neuroscience Nursing. 2021 Apr;53(2):63–8.

4. Fraud Detection [Internet]. [cited 2024 Aug 30]. Available from: https://www.qualtrics.com/support/survey-platform/survey-module/survey-checker/fraud-detection/

5. Sealed Envelope Ltd. Create a blocked randomisation list. [Internet]. 2022 [cited 2023 Apr 5]. Available from: https://www.sealedenvelope.com/simple-randomiser/v1/lists

6. Spitzer RL, Kroenke K, Williams JBW, Löwe B. A Brief Measure for Assessing Generalized Anxiety Disorder: The GAD-7. Archives of Internal Medicine. 2006 May 22;166(10):1092–7.

7. Johnson JG, Harris ES, Spitzer RL, Williams JBW. The patient health questionnaire for adolescents: validation of an instrument for the assessment of mental disorders among adolescent primary care patients. J Adolesc Health. 2002 Mar;30(3):196–204.

8. Lyneham HJ, Sburlati ES, Abbott MJ, Rapee RM, Hudson JL, Tolin DF, et al. Psychometric properties of the Child Anxiety Life Interference Scale (CALIS). Journal of Anxiety Disorders. 2013 Oct;27(7):711–9.

9. Gullone E, Taffe J. The Emotion Regulation Questionnaire for Children and Adolescents (ERQ–CA): A psychometric evaluation. Psychological Assessment. 2012;24:409–17.

10. McEvoy PM, Mahoney AEJ, Moulds ML. Are worry, rumination, and post-event processing one and the same?: Development of the repetitive thinking questionnaire. Journal of Anxiety Disorders. 2010 Jun 1;24(5):509–19.

11. Andrews JL, Khin AC, Crayn T, Humphreys K, Schweizer S. Measuring online and offline social rejection sensitivity in the digital age. Psychological Assessment,. 2022;34(8):742–51.

12. Andrews JL, Foulkes LE, Bone JK, Blakemore SJ. Amplified Concern for Social Risk in Adolescence: Development and Validation of a New Measure. Brain Sciences. 2020 Jun;10(6):397.

13. R Core Team. R: A language and environment for statistical computing [Internet]. Vienna, Austria: R Foundation for Statistical Computing; 2022 [cited 2024 Sep 4]. Available from: https://www.R-project.org/

14. Bates D, Mächler M, Bolker B, Walker S. Fitting linear mixed-effects models using lme4. Journal of Statistical Software. 2015;67:1–48.

15. Bartoń K. MuMIn: Multi-Model Inference [Internet]. 2010 [cited 2024 Jul 6]. p. 1.47.5. Available from: https://CRAN.R-project.org/package=MuMIn

16. Stanley D, Stanley MD. Package ‘apaTables.’ 2018;
